# Supplementary material for: Oxidative cross-dehydrogenative coupling between N-aryl tetrahydroisoquinolins and 5H-oxazol-4-ones through two methodologies: copper catalysis or a metal-free strategy
Source: Royal Society of Chemistry journal article supplement (doi:10.1039/c4cc04508d), 2014-10-23

Supporting Information for

**Oxidative Cross-Dehydrogenative Coupling between *N*-aryl  
Tetrahydroisoquinolins and 5*H*-Oxazol-4-ones through Two  
Methodologies: Copper Catalysis or a Metal-Free Strategy**

Xihong Liu,<sup>ab</sup> Jinlong Zhang,<sup>b</sup> Shixiong Ma,<sup>b</sup> Yunxia Ma,<sup>b</sup> and Rui Wang<sup>\*ab</sup>

<sup>a</sup>*State Key Laboratory of Chiroscience, Department of Applied Biology and Chemical Technology,  
The Hong Kong Polytechnic University, Kowloon, Hong Kong (China)*

<sup>b</sup>*Key Laboratory of Preclinical Study for New Drugs of Gansu Province, Lanzhou University,  
Lanzhou, 730000, P. R. China*

*E-mail: wangrui@lzu.edu.cn*

**Contents:**

|                                                                                                                                                   |     |
|---------------------------------------------------------------------------------------------------------------------------------------------------|-----|
| (A) General Information.....                                                                                                                      | S1  |
| (B) Attempt at asymmetric aerobic oxidative coupling reaction between<br><i>N</i> -aryl Tetrahydroisoquinolins and 5 <i>H</i> -Oxazol-4-ones..... | S1  |
| (C) Unsuccessful examples of aerobic oxidative coupling reaction of other<br>amines and 5 <i>H</i> -Oxazol-4-ones.....                            | S2  |
| (D) General procedure of aerobic oxidative coupling reaction.....                                                                                 | S3  |
| (E) General procedure of metal-free coupling reaction.....                                                                                        | S3  |
| (F) Characterization of products.....                                                                                                             | S4  |
| (G) X-ray single crystal data for <b>3c</b> .....                                                                                                 | S12 |
| (H) References.....                                                                                                                               | S13 |
| (I) Copies of <sup>1</sup> H and <sup>13</sup> C NMR.....                                                                                         | S14 |

## (A) General Information

Unless stated otherwise, all reactions were carried out in flame dried glassware. All solvents were purified and dried according to standard methods prior to use. Reactions were monitored by thin layer chromatography (TLC), column chromatography purifications were carried out using silica gel. Proton nuclear resonance ( $^1\text{H}$  NMR) spectra were recorded on 300 MHz spectrometer in  $\text{CDCl}_3$  and carbon nuclear magnetic resonance ( $^{13}\text{C}$  NMR) spectra were recorded on 75 MHz spectrometer in  $\text{CDCl}_3$  using tetramethylsilane (TMS) as internal standard. Data for  $^1\text{H}$  NMR are recorded as follows: chemical shift ( $\delta$ , ppm), multiplicity (s = singlet, d = doublet, t = triplet, m = multiplet, q = quartet or unresolved, coupling constant(s) in Hz, integration). Data for  $^{13}\text{C}$  NMR are reported in terms of chemical shift ( $\delta$ , ppm). IR spectra were recorded on a FT-IR spectrometer and only major peaks were reported in  $\text{cm}^{-1}$ . High resolution mass spectra (HRMS) were obtained by the ESI ionization sources. Substrates *N*-aryl tetrahydroisoquinolins **1**<sup>[1]</sup> and Oxazol-4(*5H*)-ones **2**<sup>[2]</sup> were prepared according to literature.

## (B) Attempt at asymmetric aerobic oxidative coupling reaction between *N*-aryl Tetrahydroisoquinolins and 5*H*-Oxazol-4-ones

Typical experimental procedure: A solution of  $\text{Cu}(\text{OTf})_2$  (0.01 mmol) and chiral ligand in anhydrous DCM (0.3 mL) under Air (for **L**<sub>1</sub> – **L**<sub>3</sub>) or Ar (for **L**<sub>4</sub> – **L**<sub>9</sub>) atmosphere was stirred at room temperature for 1 h, and then a mixture of **1a** (0.15 mmol) and **2a** (0.10 mmol) in anhydrous DCM (0.2 mL) was added. The resultant reaction mixture was stirred at room temperature under air ( $\text{O}_2$ ) atmosphere for 36 h.

**Table 1.** Optimizing reaction conditions<sup>a</sup>

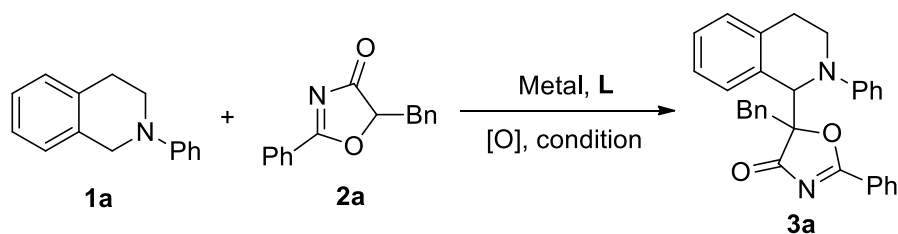

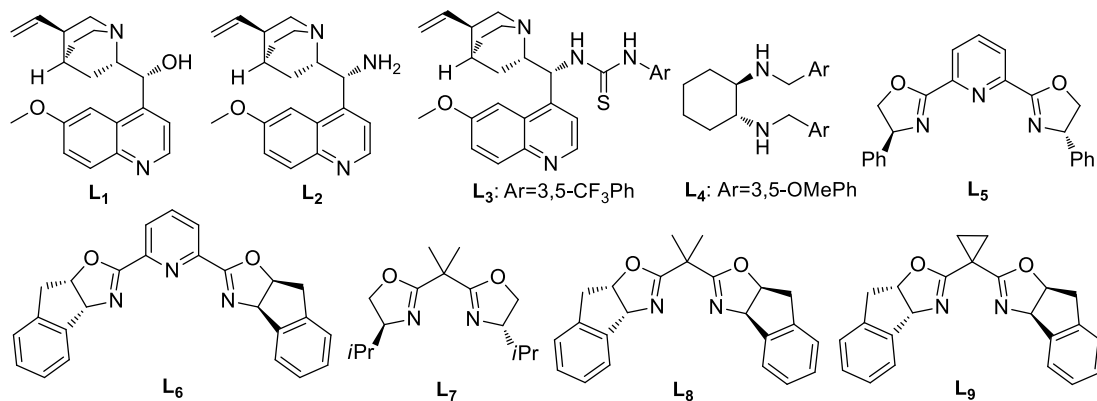

| Entry | Metal (10 mol %)                   | L (mol %)           | [O] | Ee (%) <sup>b</sup> | Conversion (%) <sup>c</sup> |
|-------|------------------------------------|---------------------|-----|---------------------|-----------------------------|
| 1     | Cu(OTf) <sub>2</sub>               | L <sub>1</sub> (20) | Air | 0                   | 67                          |
| 2     | Cu(OTf) <sub>2</sub>               | L <sub>2</sub> (20) | Air | -                   | trace                       |
| 3     | Cu(OTf) <sub>2</sub>               | L <sub>3</sub> (20) | Air | -                   | trace                       |
| 4     | Cu(OTf) <sub>2</sub>               | L <sub>4</sub> (12) | Air | 0                   | 46                          |
| 5     | Cu(OTf) <sub>2</sub>               | L <sub>5</sub> (12) | Air | -                   | trace                       |
| 6     | Cu(OTf) <sub>2</sub>               | L <sub>6</sub> (12) | Air | -                   | trace                       |
| 7     | Cu(OTf) <sub>2</sub>               | L <sub>7</sub> (12) | Air | 0                   | 88                          |
| 8     | Cu(OTf) <sub>2</sub>               | L <sub>8</sub> (12) | Air | 0                   | 47                          |
| 9     | Cu(OTf) <sub>2</sub>               | L <sub>9</sub> (12) | Air | 0                   | 35                          |
| 10    | Mg(ClO <sub>4</sub> ) <sub>2</sub> | L <sub>7</sub> (12) | Air | -                   | trace                       |

<sup>a</sup> Unless otherwise specified, the reaction was performed on a 0.1 mmol scale at room temperature. <sup>b</sup> Determined by HPLC on chiral stationary phase. <sup>c</sup> The conversion was determined by <sup>1</sup>H NMR spectroscopy of the crude mixture.

### (C) Unsuccessful examples of aerobic oxidative coupling reaction of other amines and Oxazol-4(5*H*)-ones

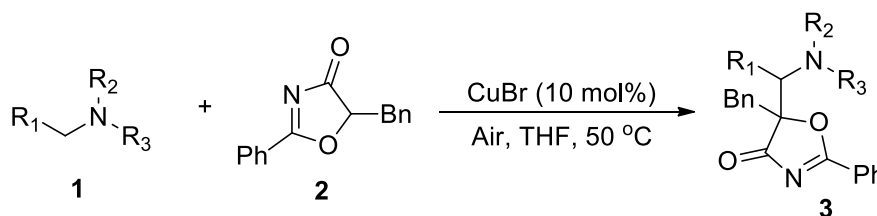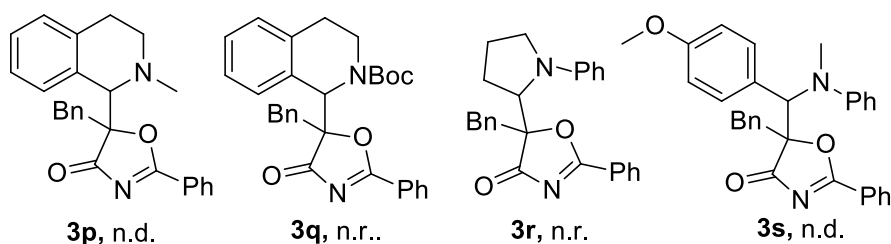

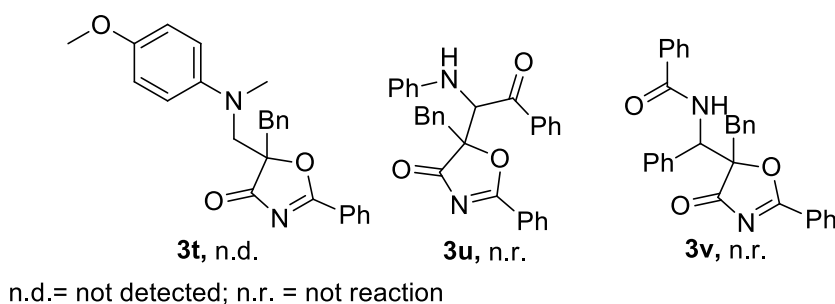

**Figure 1.** Unsuccessful examples

### (D) General procedure of aerobic oxidative coupling reaction

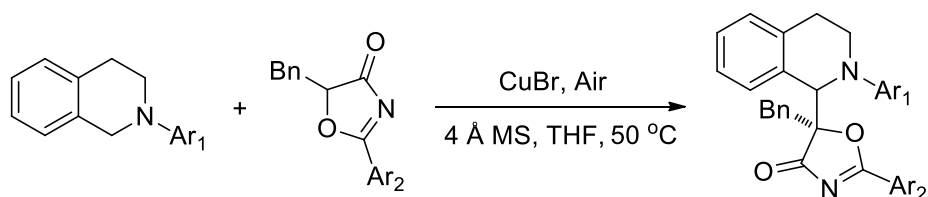

**Method A:** The reaction mixture of aryl-substituted 1,2,3,4-tetrahydroisoquinolin (0.45 mmol, 1.5 equiv) , Oxazol-4(5H)-ones (0.30 mmol, 1.0 equiv), 4Å molecular sieves (100 mg) and CuBr (0.03mmol, 0.1 equiv) in anhydrous THF (0.6 mL) was stirred at 50 °C for the appropriate time under air atmosphere. After the reaction finished (monitored by TLC), the resulting mixture was concentrated under reduced pressure and the residue was purified by silica gel chromatography (eluent, ethyl acetate / hexane 1:7) to afford the desired coupling products, which can be further purified by recrystallization.

### (E) General procedure of metal-free coupling reaction

#### 1. The optimization of reaction conditions

**Table 2.** Optimizing reaction conditions <sup>a</sup>

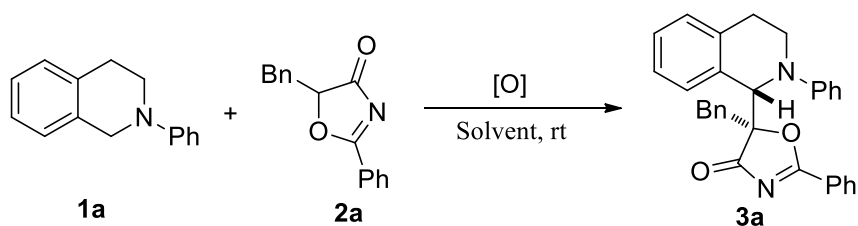

| Entry | [O]                       | Solvent                         | Conversion (%) <sup>b</sup> |
|-------|---------------------------|---------------------------------|-----------------------------|
| 1     | TBHP                      | CH <sub>2</sub> Cl <sub>2</sub> | 60                          |
| 2     | <i>t</i> BuOO <i>t</i> Bu | CH <sub>2</sub> Cl <sub>2</sub> | 38                          |

|   |                                              |                                 |    |
|---|----------------------------------------------|---------------------------------|----|
| 3 | DDQ                                          | CH <sub>2</sub> Cl <sub>2</sub> | 38 |
| 4 | PhI(OAc) <sub>2</sub>                        | CH <sub>2</sub> Cl <sub>2</sub> | 90 |
| 5 | K <sub>2</sub> S <sub>2</sub> O <sub>8</sub> | CH <sub>2</sub> Cl <sub>2</sub> | 43 |
| 6 | PhI(OAc) <sub>2</sub>                        | THF                             | 98 |
| 7 | PhI(OAc) <sub>2</sub>                        | toluene                         | 84 |

<sup>a</sup> Reactions were carried out with **1a** (0.12 mmol), **2a** (0.1 mmol), oxidant (0.12 mmol) in solvent (0.4 mL) for 24h. <sup>b</sup> The conversion was determined by <sup>1</sup>H NMR spectroscopy of the crude mixture.

Several oxidants were evaluated. As summarized in Table 1, excellent conversion could be obtained in the presence of PhI(OAc)<sub>2</sub> and subsequent screening of solvent displayed that THF gave the best result.

## 2. General Procedure for synthesis of compound 3

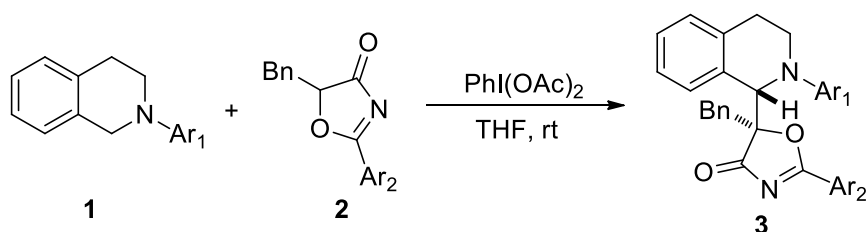

**Method B:** The reaction mixture of aryl-substituted 1,2,3,4-tetrahydroisoquinolin (0.12 mmol, 1.2 equiv), Oxazol-4(5H)-ones (0.10 mmol, 1.0 equiv) and PhI(OAc)<sub>2</sub> (0.12 mmol, 1.2 equiv) in anhydrous THF (0.4 mL) was stirred at room temperature for 24h. Then the resulting mixture was concentrated under reduced pressure and the residue was purified by silica gel chromatography (eluent, ethyl acetate / hexane 1:7) to afford the desired coupling products, which can be further purified by recrystallization.

## (F) Characterization of products

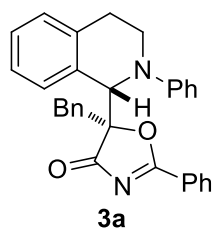

**5-benzyl-2-phenyl-5-(2-phenyl-1,2,3,4-tetrahydroisoquinolin-1-yl)oxazol-4(5H)-one:** yellow solid, m.p. 186 – 188 °C; 82% yield (method B: 87% yield); <sup>1</sup>H NMR (300

MHz, CDCl<sub>3</sub>)  $\delta$  7.69 (d,  $J = 7.3$  Hz, 2H), 7.60-7.42 (m, 1H), 7.43-7.20 (m, 4H), 7.21 – 7.01 (m, 8H), 6.96 (s, 3H), 6.83 (t,  $J = 6.7$  Hz, 1H), 5.50 (s, 1H), 4.20 – 4.01 (m, 1H), 3.98 – 3.79 (m, 1H), 3.62 (d,  $J = 14.2$  Hz, 1H), 3.36 (d,  $J = 14.2$  Hz, 1H), 3.19 – 2.91 (m, 2H); <sup>13</sup>C NMR (75 MHz, CDCl<sub>3</sub>)  $\delta$  193.42, 185.42, 149.39, 135.53, 134.68, 133.22, 131.29, 130.01, 129.48, 129.28, 128.57, 128.25, 128.14, 127.69, 127.14, 127.06, 126.06, 125.11, 118.72, 114.76, 95.55, 63.31, 43.03, 39.86, 26.11; **IR**: 3464.6, 2924.7, 2158.2, 1738.4, 1536.4, 1359.9, 1177.0, 942.3, 751.9, 548.0 cm<sup>-1</sup>. **HRMS (ESI)**: calcd for C<sub>31</sub>H<sub>26</sub>N<sub>2</sub>O<sub>2</sub>+Na<sup>+</sup>: 481.1886; found: 481.1885.

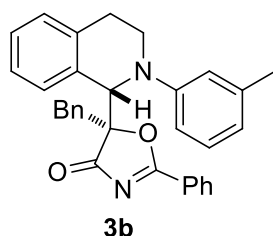

**5-benzyl-2-phenyl-5-(2-(m-tolyl)-1,2,3,4-tetrahydroisoquinolin-1-yl)oxazol-4(5H)-one**: yellow solid, m.p. 175 - 176 °C; 77% yield; <sup>1</sup>H NMR (300 MHz, CDCl<sub>3</sub>)  $\delta$  7.69 (d,  $J = 7.6$  Hz, 2H), 7.51 (t,  $J = 7.2$  Hz, 1H), 7.32 (t,  $J = 7.4$  Hz, 2H), 7.27 – 7.01 (m, 7H), 6.94 (d,  $J = 8.8$  Hz, 5H), 6.66 (d,  $J = 7.2$  Hz, 1H), 5.49 (s, 1H), 4.20 – 4.01 (m, 1H), 4.01 – 3.84 (m, 1H), 3.62 (d,  $J = 14.2$  Hz, 1H), 3.36 (d,  $J = 14.2$  Hz, 1H), 3.20 – 3.03 (m, 1H), 3.00-2.93 (m, 1H), 2.35 (s, 3H); <sup>13</sup>C NMR (75 MHz, CDCl<sub>3</sub>)  $\delta$  193.46, 185.42, 149.46, 139.26, 135.50, 134.67, 133.25, 131.29, 130.00, 129.32, 129.27, 128.56, 128.30, 128.13, 127.63, 127.12, 127.05, 125.99, 125.10, 119.66, 115.53, 112.00, 95.67, 63.27, 42.89, 39.86, 26.02, 21.92; **IR**: 3382.0, 2923.6, 2370.7, 1886.7, 1746.5, 1602.2, 1450.9, 1261.3, 1115.4, 1026.9, 702.9, 603.5 cm<sup>-1</sup>. **HRMS (ESI)**: calcd for C<sub>32</sub>H<sub>28</sub>N<sub>2</sub>O<sub>2</sub>+Na<sup>+</sup>: 495.2043; found: 495.2048.

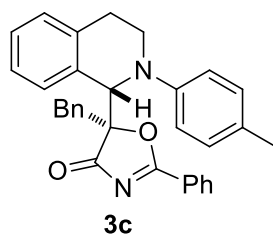

**5-benzyl-2-phenyl-5-(2-(p-tolyl)-1,2,3,4-tetrahydroisoquinolin-1-yl)oxazol-4(5H)-**

**one:** yellow solid, m.p. 181 - 183 °C; 71% yield (method B: 86% yield); **<sup>1</sup>H NMR** (300 MHz, CDCl<sub>3</sub>) δ 7.69 (d, *J* = 7.4 Hz, 2H), 7.50 (t, *J* = 7.4 Hz, 1H), 7.30 (t, *J* = 7.7 Hz, 2H), 7.16-6.97 (m, 10H), 6.94 (s, 3H), 5.42 (s, 1H), 4.19 – 4.01 (m, 1H), 3.94 – 3.76 (m, 1H), 3.64 (d, *J* = 14.2 Hz, 1H), 3.34 (d, *J* = 14.2 Hz, 1H), 3.16 – 2.87 (m, 2H), 2.26 (s, 3H); **<sup>13</sup>C NMR** (75 MHz, CDCl<sub>3</sub>) δ 193.46, 185.39, 147.25, 135.56, 134.64, 133.30, 131.27, 129.98, 129.92, 129.23, 128.53, 128.26, 128.17, 128.09, 127.58, 127.07, 127.04, 125.96, 125.09, 115.22, 95.70, 63.40, 43.30, 39.83, 25.85, 20.25; **IR:** 3374.8, 2921.7, 2374.7, 1748.3, 1548.1, 1359.1, 1176.9, 941.6, 800.9, 703.6, 553.6 cm<sup>-1</sup>. **HRMS (ESI):** calcd for C<sub>32</sub>H<sub>28</sub>N<sub>2</sub>O<sub>2</sub>+Na<sup>+</sup>: 495.2043; found: 495.2045.

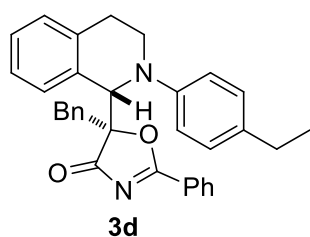

**5-benzyl-5-(2-(4-ethylphenyl)-1,2,3,4-tetrahydroisoquinolin-1-yl)-2-phenyloxazol-4(5H)-one:** yellow solid, m.p. 183 - 184 °C; 87% yield; **<sup>1</sup>H NMR** (300 MHz, CDCl<sub>3</sub>) δ 7.69 (d, *J* = 7.1 Hz, 2H), 7.54 – 7.43 (m, 1H), 7.36 – 7.24 (m, 2H), 7.20-7.00 (m, 10H), 6.93 (s, 3H), 5.44 (s, 1H), 4.20-4.00 (m, 1H), 3.89-3.75 (m, 1H), 3.65 (d, *J* = 14.2 Hz, 1H), 3.35 (d, *J* = 14.1 Hz, 1H), 3.20-2.85 (m, 2H), 2.66 – 2.44 (m, 2H), 1.19 (t, *J* = 7.4 Hz, 3H); **<sup>13</sup>C NMR** (75 MHz, CDCl<sub>3</sub>) δ 193.45, 185.37, 147.41, 135.56, 134.61, 133.28, 131.28, 129.96, 129.20, 128.71, 128.51, 128.39, 128.24, 128.07, 127.55, 127.05, 127.01, 126.90, 125.93, 125.07, 115.12, 95.66, 63.45, 43.23, 39.83, 27.71, 25.88, 15.77; **IR:** 3360.1, 2962.1, 1961.1, 1748.6, 1548.1, 1359.4, 1177.5, 942.3, 703.6, 599.5 cm<sup>-1</sup>. **HRMS (ESI):** calcd for C<sub>33</sub>H<sub>30</sub>N<sub>2</sub>O<sub>2</sub>+Na<sup>+</sup>: 509.2199; found: 509.2208.

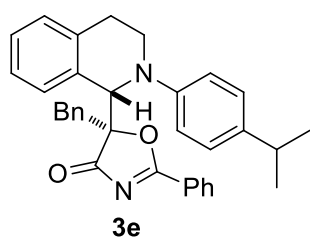

**5-benzyl-5-(2-(4-isopropylphenyl)-1,2,3,4-tetrahydroisoquinolin-1-yl)-2-**

**phenyloxazol-4(5H)-one:** yellow solid, m.p. 195 - 197 °C; 69% yield; **<sup>1</sup>H NMR** (300 MHz, CDCl<sub>3</sub>) δ 7.69 (d, *J* = 7.5 Hz, 2H), 7.50 (t, *J* = 7.4 Hz, 1H), 7.31 (t, *J* = 7.7 Hz, 2H), 7.21 – 6.99 (m, 10H), 6.99 – 6.87 (m, 3H), 5.44 (s, 1H), 4.18 – 4.01 (m, 1H), 3.94 – 3.79 (m, 1H), 3.65 (d, *J* = 14.2 Hz, 1H), 3.37 (d, *J* = 14.2 Hz, 1H), 3.15-2.70 (m, 3H), 1.23 (s, 3H), 1.21 (s, 3H); **<sup>13</sup>C NMR** (75 MHz, CDCl<sub>3</sub>) δ 193.49, 185.39, 147.47, 139.26, 135.59, 134.63, 133.32, 131.34, 130.00, 129.25, 128.54, 128.25, 128.11, 127.58, 127.28, 127.09, 127.05, 125.97, 125.12, 114.98, 95.68, 63.53, 43.18, 39.87, 33.02, 25.94, 24.12; **IR:** 3342.6, 2958.3, 2370.0, 1748.7, 1548.4, 1451.5, 1359.1, 1176.9, 942.3, 748.0, 702.9, 546.0 cm<sup>-1</sup>. **HRMS (ESI):** calcd for C<sub>34</sub>H<sub>32</sub>N<sub>2</sub>O<sub>2</sub>+Na<sup>+</sup>: 523.2356; found: 523.2360.

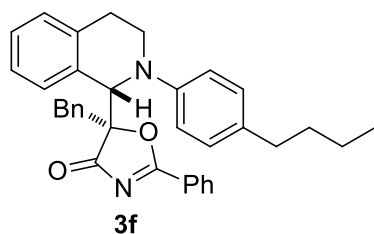

**5-benzyl-5-(2-(4-butylphenyl)-1,2,3,4-tetrahydroisoquinolin-1-yl)-2-**

**phenyloxazol-4(5H)-one:** yellow solid, m.p. 157 - 159 °C; 75% yield; **<sup>1</sup>H NMR** (300 MHz, CDCl<sub>3</sub>) δ 7.69 (d, *J* = 7.6 Hz, 2H), 7.51 (t, *J* = 7.2 Hz, 1H), 7.31 (t, *J* = 7.5 Hz, 2H), 7.21 – 6.99 (m, 10H), 6.95 (s, 3H), 5.43 (s, 1H), 4.19 – 4.00 (m, 1H), 3.94 – 3.78 (m, 1H), 3.65 (d, *J* = 14.3 Hz, 1H), 3.36 (d, *J* = 14.2 Hz, 1H), 3.17 – 3.01 (m, 1H), 3.01 – 2.86 (m, 1H), 2.53 (t, *J* = 7.5 Hz, 2H), 1.69 – 1.45 (m, 2H), 1.43-1.20 (m, 2H), 0.91 (t, *J* = 7.2 Hz, 3H); **<sup>13</sup>C NMR** (75 MHz, CDCl<sub>3</sub>) δ 193.49, 185.40, 147.42, 135.61, 134.64, 133.36, 131.36, 130.02, 129.30, 128.55, 128.27, 128.12, 127.60, 127.09, 126.00, 125.16, 115.09, 95.73, 63.50, 43.27, 39.88, 34.55, 33.84, 25.95, 22.33, 13.96; **IR:** 3335.0, 2926.9, 2372.0, 1749.1, 1548.9, 1359.2, 1176.6, 942.0, 703.7, 548.3 cm<sup>-1</sup>. **HRMS (ESI):** calcd for C<sub>35</sub>H<sub>34</sub>N<sub>2</sub>O<sub>2</sub>+Na<sup>+</sup>: 537.2512; found: 537.2532.



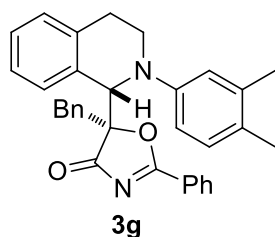

**5-benzyl-5-(2-(3,4-dimethylphenyl)-1,2,3,4-tetrahydroisoquinolin-1-yl)-2-phenyloxazol-4(5H)-one:** yellow solid, m.p. 151 - 153 °C; 84% yield; <sup>1</sup>H NMR (300 MHz, CDCl<sub>3</sub>) δ 7.70 (d, *J* = 7.5 Hz, 2H), 7.51 (t, *J* = 7.4 Hz, 1H), 7.32 (t, *J* = 7.7 Hz, 2H), 7.19 – 6.99 (m, 7H), 7.00-6.85 (m, 5H), 5.42 (s, 1H), 4.19 – 4.01 (m, 1H), 3.97 – 3.82 (m, 1H), 3.65 (d, *J* = 14.2 Hz, 1H), 3.34 (d, *J* = 14.2 Hz, 1H), 3.15-3.03 (m, 1H), 2.97-2.87 (m, 1H), 2.26 (s, 3H), 2.18 (s, 3H); <sup>13</sup>C NMR (75 MHz, CDCl<sub>3</sub>) δ 193.50, 185.41, 147.69, 137.55, 135.57, 134.63, 133.38, 131.32, 130.45, 130.02, 129.27, 128.55, 128.33, 128.12, 127.55, 127.08, 125.95, 125.17, 116.83, 112.75, 95.84, 63.36, 43.18, 39.88, 25.84, 20.36, 18.65; **IR:** 3354.9, 2923.5, 1960.2, 1748.0, 1604.0, 1451.3, 1176.0, 1025.5, 703.2, 599.7 cm<sup>-1</sup>. **HRMS (ESI):** calcd for C<sub>33</sub>H<sub>30</sub>N<sub>2</sub>O<sub>2</sub>+Na<sup>+</sup>: 509.2199; found: 509.2203.

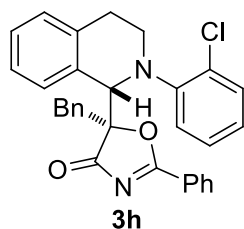

**5-benzyl-5-(2-(2-chlorophenyl)-1,2,3,4-tetrahydroisoquinolin-1-yl)-2-phenyloxazol-4(5H)-one:** yellow solid, m.p. 154 - 156 °C; 49% yield (method B: 72% yield); <sup>1</sup>H NMR (300 MHz, CDCl<sub>3</sub>) δ 7.69 (d, *J* = 7.4 Hz, 2H), 7.52 (t, *J* = 7.4 Hz, 1H), 7.32 (t, *J* = 7.7 Hz, 2H), 7.24 (d, *J* = 8.8 Hz, 2H), 7.12-7.01 (m, 8H), 6.98 (s, 3H), 5.41 (s, 1H), 4.17 – 4.00 (m, 1H), 3.92 – 3.73 (m, 1H), 3.56 (d, *J* = 14.1 Hz, 1H), 3.32 (d, *J* = 14.2 Hz, 1H), 3.19 – 2.91 (m, 2H); <sup>13</sup>C NMR (75 MHz, CDCl<sub>3</sub>) δ 193.23, 185.46, 148.00, 135.31, 134.78, 132.99, 130.94, 129.98, 129.26, 128.60, 128.26, 128.18, 127.88, 127.23, 127.05, 126.20, 125.00, 123.55, 115.99, 95.24, 63.36, 43.35, 39.80, 26.04; **IR:** 3341.9, 2925.5, 2371.5, 1748.4, 1547.7, 1359.0, 1177.7, 941.2, 809.4, 700.9, 549.6 cm<sup>-1</sup>. **HRMS (ESI):** calcd for C<sub>31</sub>H<sub>25</sub>ClN<sub>2</sub>O<sub>2</sub>+Na<sup>+</sup>: 515.1497; found: 515.1514.

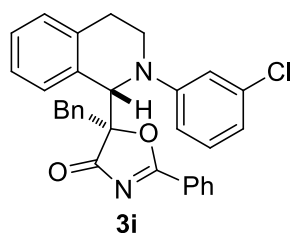

**5-benzyl-5-(2-(3-chlorophenyl)-1,2,3,4-tetrahydroisoquinolin-1-yl)-2-**

**phenyloxazol-4(5H)-one:** yellow solid, m.p. 141 - 143 °C; 68% yield (method B: 79% yield); <sup>1</sup>H NMR (300 MHz, CDCl<sub>3</sub>) δ 7.69 (d, *J* = 7.6 Hz, 2H), 7.53 (t, *J* = 7.2 Hz, 1H), 7.32 (t, *J* = 7.5 Hz, 2H), 7.26 – 7.19 (m, 1H), 7.11 – 6.98 (m, 11H), 6.79 (d, *J* = 7.5 Hz, 1H), 5.45 (s, 1H), 4.19 – 3.99 (m, 1H), 3.95 – 3.76 (m, 1H), 3.54 (d, *J* = 14.2 Hz, 1H), 3.33 (d, *J* = 14.1 Hz, 1H), 3.23 – 2.93 (m, 2H); <sup>13</sup>C NMR (75 MHz, CDCl<sub>3</sub>) δ 193.12, 185.46, 150.46, 135.35, 135.23, 134.79, 132.93, 130.86, 130.43, 130.00, 129.30, 128.61, 128.30, 128.19, 127.93, 127.25, 127.09, 126.22, 124.99, 118.56, 114.45, 112.75, 95.17, 63.20, 43.03, 39.81, 26.13; **IR:** 3366.4, 2925.7, 2371.6, 1748.7, 1547.7, 1358.8, 1177.8, 944.9, 701.0, 545.6 cm<sup>-1</sup>. **HRMS (ESI):** calcd for C<sub>31</sub>H<sub>25</sub>ClN<sub>2</sub>O<sub>2</sub>+Na<sup>+</sup>: 515.1497; found: 515.1512.

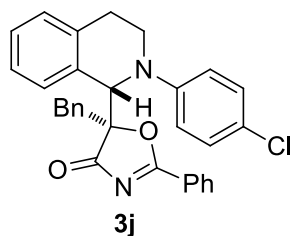

**5-benzyl-5-(2-(4-chlorophenyl)-1,2,3,4-tetrahydroisoquinolin-1-yl)-2-**

**phenyloxazol-4(5H)-one:** yellow solid, m.p. 138 - 140 °C ; 74% yield (method B: 85% yield); <sup>1</sup>H NMR (300 MHz, CDCl<sub>3</sub>) δ 7.69 (d, *J* = 7.4 Hz, 2H), 7.52 (t, *J* = 7.0 Hz, 1H), 7.32 (t, *J* = 7.4 Hz, 2H), 7.24 (d, *J* = 8.5 Hz, 2H), 7.20-6.80 (m, 11H), 5.41 (s, 1H), 4.20 – 3.98 (m, 1H), 3.91 – 3.72 (m, 1H), 3.57 (d, *J* = 14.1 Hz, 1H), 3.32 (d, *J* = 14.1 Hz, 1H), 3.19 – 2.90 (m, 2H); <sup>13</sup>C NMR (75 MHz, CDCl<sub>3</sub>) δ 193.23, 185.46, 148.00, 135.31, 134.78, 132.99, 130.93, 129.98, 129.26, 128.60, 128.27, 128.18, 127.88, 127.23, 127.05, 126.20, 125.00, 123.55, 115.99, 95.24, 63.36, 43.35, 39.81, 26.04; **IR:** 3339.7, 2925.5, 1748.4, 1547.4, 1494.3, 1358.9, 1177.6, 941.0, 808.8, 700.6, 549.3 cm<sup>-1</sup>. **HRMS (ESI):** calcd for C<sub>31</sub>H<sub>25</sub>ClN<sub>2</sub>O<sub>2</sub>+Na<sup>+</sup>: 515.1497; found: 515.1513.

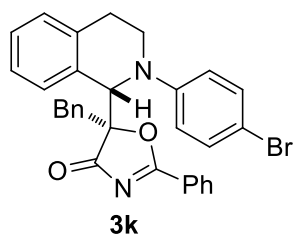

**5-benzyl-5-(2-(4-bromophenyl)-1,2,3,4-tetrahydroisoquinolin-1-yl)-2-**

**phenyloxazol-4(5H)-one:** yellow solid, m.p. 152 - 154 °C; 66% yield (method B: 77% yield); <sup>1</sup>H NMR (300 MHz, CDCl<sub>3</sub>) δ 7.68 (d, *J* = 7.3 Hz, 2H), 7.50-7.35 (m, 1H), 7.42 – 7.21 (m, 4H), 7.10-6.95 (m, 11H), 5.42 (s, 1H), 4.09-4.02 (m, 1H), 3.89 – 3.71 (m, 1H), 3.55 (d, *J* = 14.1 Hz, 1H), 3.31 (d, *J* = 14.1 Hz, 1H), 3.15-2.90 (m, 2H); <sup>13</sup>C NMR (75 MHz, CDCl<sub>3</sub>) δ 193.18, 185.42, 148.33, 135.26, 134.77, 132.89, 132.09, 130.85, 129.91, 129.22, 128.56, 128.21, 128.12, 127.85, 127.19, 126.95, 126.12, 124.87, 116.25, 110.59, 95.11, 63.22, 43.17, 39.73, 26.02; **IR:** 3337.2, 2925.5, 2370.8, 1747.9, 1547.5, 1358.8, 1177.5, 995.3, 806.1, 699.7, 503.4 cm<sup>-1</sup>. **HRMS (ESI):** calcd for C<sub>31</sub>H<sub>25</sub>BrN<sub>2</sub>O<sub>2</sub>+Na<sup>+</sup>: 559.0992; found: 559.1016.

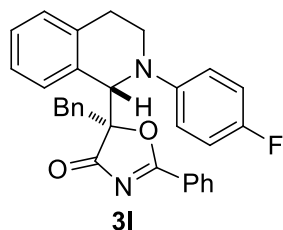

**5-benzyl-5-(2-(4-fluorophenyl)-1,2,3,4-tetrahydroisoquinolin-1-yl)-2-**

**phenyloxazol-4(5H)-one:** yellow solid, m.p. 74 - 76 °C; 55% yield (method B: 74% yield); <sup>1</sup>H NMR (300 MHz, CDCl<sub>3</sub>) δ 7.69 (d, *J* = 5.5 Hz, 2H), 7.60-7.43 (m, 1H), 7.44-7.20 (m, 2H), 7.21-6.80 (m, 13H), 5.32 (s, 1H), 4.20-3.98 (m, 1H), 3.90-3.70 (m, 1H), 3.65 (d, *J* = 13.9 Hz, 1H), 3.31 (d, *J* = 13.9 Hz, 1H), 3.15-2.80 (m, 2H); <sup>13</sup>C NMR (75 MHz, CDCl<sub>3</sub>) δ 193.32, 185.47, 146.10, 135.42, 134.72, 133.17, 130.98, 129.99, 129.26, 128.57, 128.36, 128.15, 127.74, 127.17, 127.06, 126.13, 125.05, 117.09, 117.00, 115.95, 115.65, 95.50, 63.74, 44.08, 39.84, 25.61; **IR:** 3479.7, 3062.2, 1965.0, 1748.5, 1603.8, 1359.5, 1177.8, 941.7, 822.2, 704.0, 554.1 cm<sup>-1</sup>. **HRMS (ESI):** calcd for C<sub>31</sub>H<sub>25</sub>FN<sub>2</sub>O<sub>2</sub>+Na<sup>+</sup>: 499.1792; found: 499.1796.

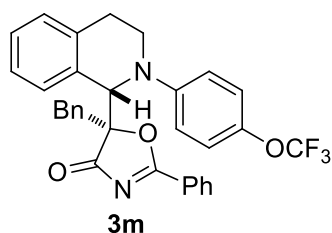

**5-benzyl-2-phenyl-5-(2-(4-(trifluoromethoxy)phenyl)-1,2,3,4-**

**tetrahydroisoquinolin-1-yl)oxazol-4(5H)-one:** yellow solid, m.p. 125 - 127 °C; 64% yield; <sup>1</sup>H NMR (300 MHz, CDCl<sub>3</sub>) δ 7.69 (d, *J* = 7.3 Hz, 2H), 7.60-7.43 (m, 1H), 7.33 (t, *J* = 7.7 Hz, 2H), 7.19 – 7.03 (m, 10H), 7.03 – 6.88 (m, 3H), 5.43 (s, 1H), 4.19 – 4.00 (m, 1H), 3.90 – 3.77 (m, 1H), 3.58 (d, *J* = 14.2 Hz, 1H), 3.33 (d, *J* = 14.2 Hz, 1H), 3.22 – 2.89 (m, 2H); <sup>13</sup>C NMR (75 MHz, CDCl<sub>3</sub>) δ 193.22, 185.50, 148.17, 135.30, 134.80, 132.99, 130.92, 130.01, 129.31, 128.62, 128.30, 128.21, 127.93, 127.27, 127.10, 126.96, 126.27, 125.03, 122.44, 115.95, 115.40, 95.19, 63.52, 43.49, 39.84, 26.04; **IR:** 3365.2, 2923.3, 2378.1, 1745.8, 1603.6, 1452.1, 1360.0, 1259.5, 1093.2, 801.2, 703.5 cm<sup>-1</sup>. **HRMS (ESI):** calcd for C<sub>32</sub>H<sub>25</sub>FN<sub>2</sub>O<sub>3</sub>+Na<sup>+</sup>: 565.1709; found: 565.1717.

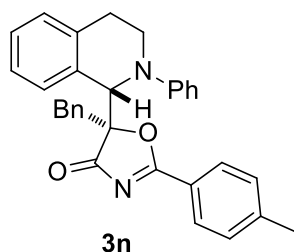

**5-benzyl-5-(2-phenyl-1,2,3,4-tetrahydroisoquinolin-1-yl)-2-(p-tolyl)oxazol-4(5H)-**

**one:** yellow solid, m.p. 192 - 194 °C; 61% yield (method B: 90% yield); <sup>1</sup>H NMR (300 MHz, CDCl<sub>3</sub>) δ 7.60 (d, *J* = 8.2 Hz, 2H), 7.30 (t, *J* = 8.0 Hz, 2H), 7.18 – 7.08 (m, 6H), 7.08 – 7.00 (m, 4H), 7.00 – 6.88 (m, 3H), 6.82 (t, *J* = 7.2 Hz, 1H), 5.49 (s, 1H), 4.16 – 4.02 (m, 1H), 3.96 – 3.81 (m, 1H), 3.60 (d, *J* = 14.2 Hz, 1H), 3.35 (d, *J* = 14.2 Hz, 1H), 3.17 – 2.90 (m, 2H), 2.33 (s, 3H); <sup>13</sup>C NMR (75 MHz, CDCl<sub>3</sub>) δ 193.40, 185.38, 149.39, 146.01, 135.51, 133.30, 131.34, 130.00, 129.45, 129.36, 128.20, 128.09, 127.64, 127.07, 126.00, 122.27, 118.63, 114.70, 95.32, 63.26, 42.98, 39.82, 26.09, 21.88; **IR:** 3463.3, 2927.0, 2365.4, 1921.7, 1744.2, 1548.0, 1358.1, 1183.8, 943.4, 736.6, 601.5, 483.3 cm<sup>-1</sup>. **HRMS (ESI):** calcd for C<sub>32</sub>H<sub>28</sub>N<sub>2</sub>O<sub>2</sub>+Na<sup>+</sup>: 495.2043; found: 495.2055.

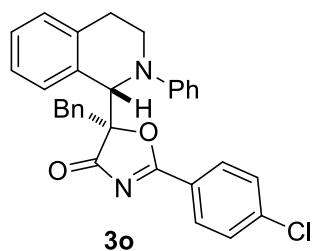

**5-benzyl-2-(4-chlorophenyl)-5-(2-phenyl-1,2,3,4-tetrahydroisoquinolin-1-yl)oxazol-4(5H)-one:** yellow solid, m.p. 196 - 198 °C; 57% yield (method B: 81% yield);  $^1\text{H NMR}$  (300 MHz,  $\text{CDCl}_3$ )  $\delta$  7.62 (d,  $J = 8.4$  Hz, 2H), 7.31 (t,  $J = 8.1$  Hz, 4H), 7.18 – 7.01 (m, 8H), 6.96 (d,  $J = 9.4$  Hz, 3H), 6.84 (t,  $J = 7.1$  Hz, 1H), 5.49 (s, 1H), 4.26 – 3.97 (m, 1H), 3.97 – 3.81 (m, 1H), 3.61 (d,  $J = 14.2$  Hz, 1H), 3.36 (d,  $J = 14.2$  Hz, 1H), 3.22 – 3.04 (m, 1H), 3.04 – 2.89 (m, 1H);  $^{13}\text{C NMR}$  (75 MHz,  $\text{CDCl}_3$ )  $\delta$  193.15, 184.37, 149.33, 141.35, 135.51, 133.11, 131.20, 130.47, 129.96, 129.50, 129.12, 128.27, 128.18, 127.78, 127.22, 127.01, 126.10, 123.50, 118.82, 114.78, 95.84, 63.34, 43.09, 39.83, 26.14; **IR:** 3366.2, 2923.3, 2368.1, 1739.0, 1597.3, 1260.5, 1085.6, 942.8, 742.3, 604.4  $\text{cm}^{-1}$ . **HRMS (ESI):** calcd for  $\text{C}_{31}\text{H}_{25}\text{ClN}_2\text{O}_2 + \text{Na}^+$ : 515.1497; found: 515.1502.

**(G) X-ray single crystal data for 3c**

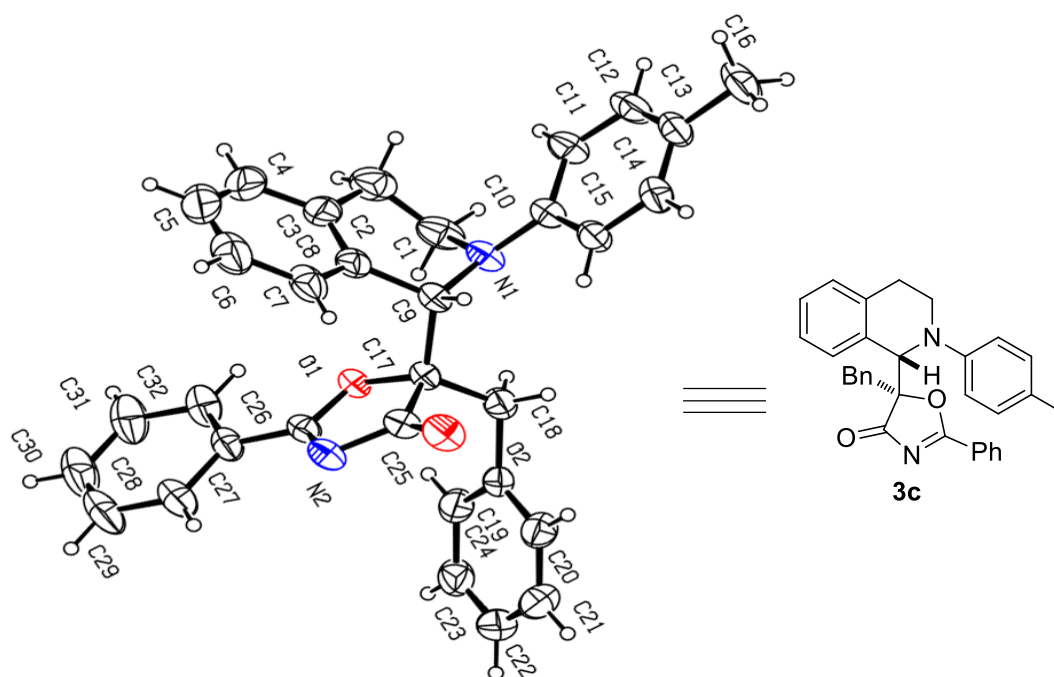

Bond precision: C-C=0.0045 Å Wavelength=0.71073

Cell: a = 6.5198 (3) b = 16.3244 (7) c = 24.2413 (9)

alpha = 90 beta = 94.884 (4) gamma = 90

Temperature: 293 K

|                        | Calculated    | Reported      |
|------------------------|---------------|---------------|
| Volume                 | 2570.68(19)   | 2570.66(18)   |
| Space group            | P 21/c        | P 1 21/c 1    |
| Hall group             | -P 2ybc       | -P 2ybc       |
| Moiety formula         | C32 H28 N2 O2 | C32 H28 N2 O2 |
| Sum formula            | C32 H28 N2 O2 | C32 H28 N2 O2 |
| Mr                     | 472.56        | 472.56        |
| Dx, g cm <sup>-3</sup> | 1.221         | 1.221         |
| Z                      | 4             | 4             |
| Mu (mm <sup>-1</sup> ) | 0.076         | 0.076         |
| F000                   | 1000.0        | 1000.0        |
| F000'                  | 1000.40       |               |
| h, k, lmax             | 8, 21, 32     | 8, 21, 30     |
| Nref                   | 6508          | 5764          |
| Tmin, Tmax             | 0.973, 0.981  | 0.566, 1.000  |
| Tmin'                  | 0.973         |               |

Correction method = MULTI-SCAN

Data completeness = 0.886 Theta (max) = 28.477

R (reflections) = 0.0667 (3293) wR2 (reflections) = 0.1843 (5764)

S = 1.073 Npar = 373

---

## (H) References

[1] X.-Z. Shu, X.-F. Xia, K.-G. Ji, X.-Y. Liu and Y.-M. Liang, *J. Org. Chem.*, 2009, **74**, 7464.

[2] T. Misaki, G. Takimoto and T. Sugimura, *J. Am. Chem. Soc.*, 2010, **132**, 6286.

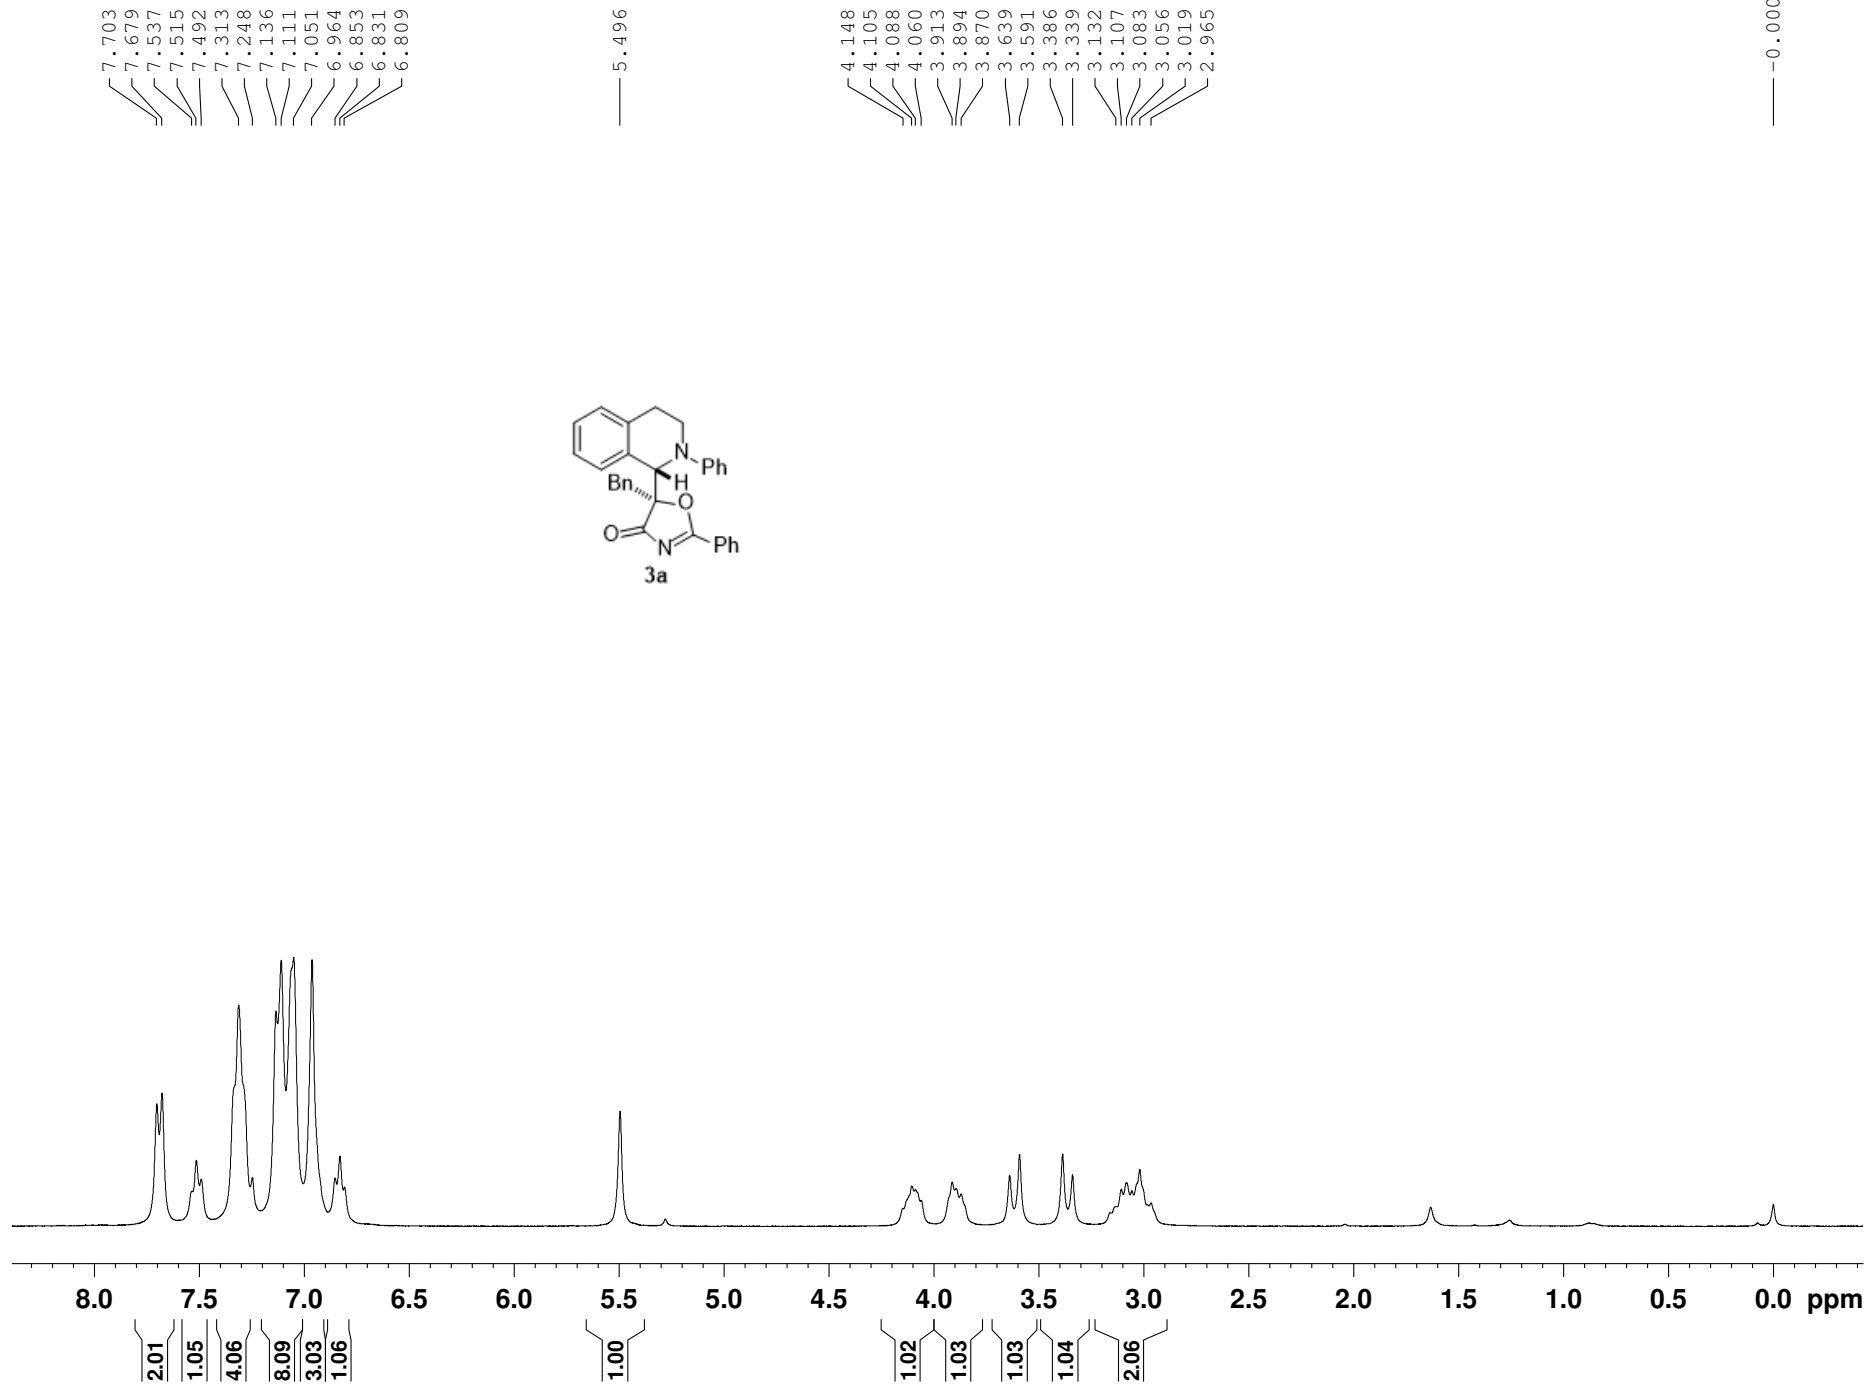

S14

— 193.41

— 185.42

149.38  
135.52  
134.68  
133.22  
131.29  
130.01  
129.48  
129.27  
128.57  
128.25  
128.13  
127.69  
127.14  
127.06  
126.06  
125.11  
118.72  
114.76

— 95.55

77.42  
77.00  
76.57

— 63.31

— 43.03  
— 39.85

— 26.10

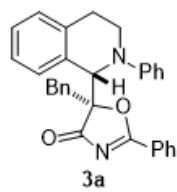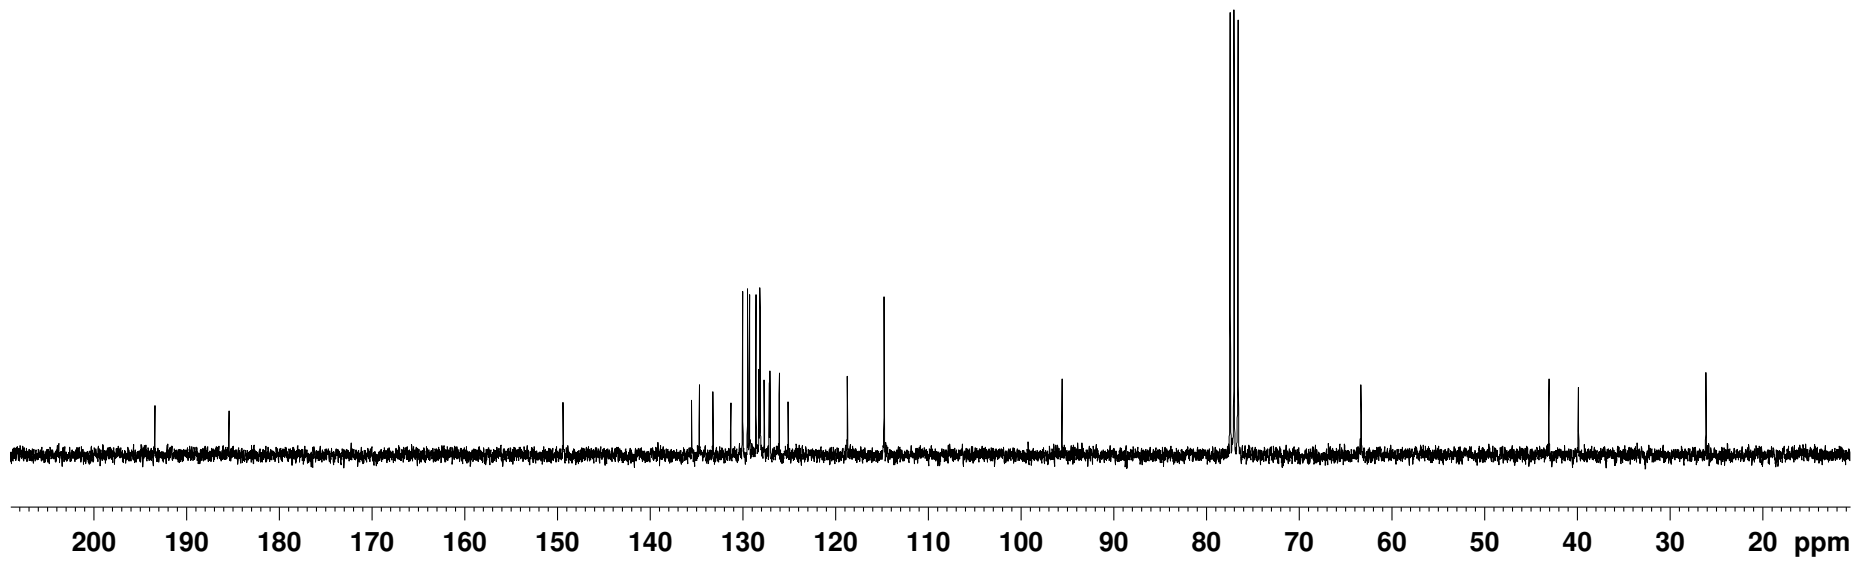



7.707  
7.681  
7.537  
7.513  
7.489  
7.340  
7.316  
7.291  
7.245  
7.217  
7.192  
7.166  
7.110  
7.051  
6.954  
6.925  
6.669  
6.645

5.487

4.148  
4.103  
4.088  
4.075  
4.056  
3.936  
3.918  
3.892  
3.641  
3.594  
3.381  
3.333  
3.165  
3.138  
3.111  
3.087  
3.060  
2.991  
2.952  
2.937  
2.351

0.000

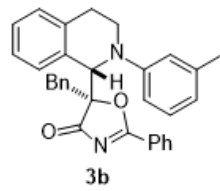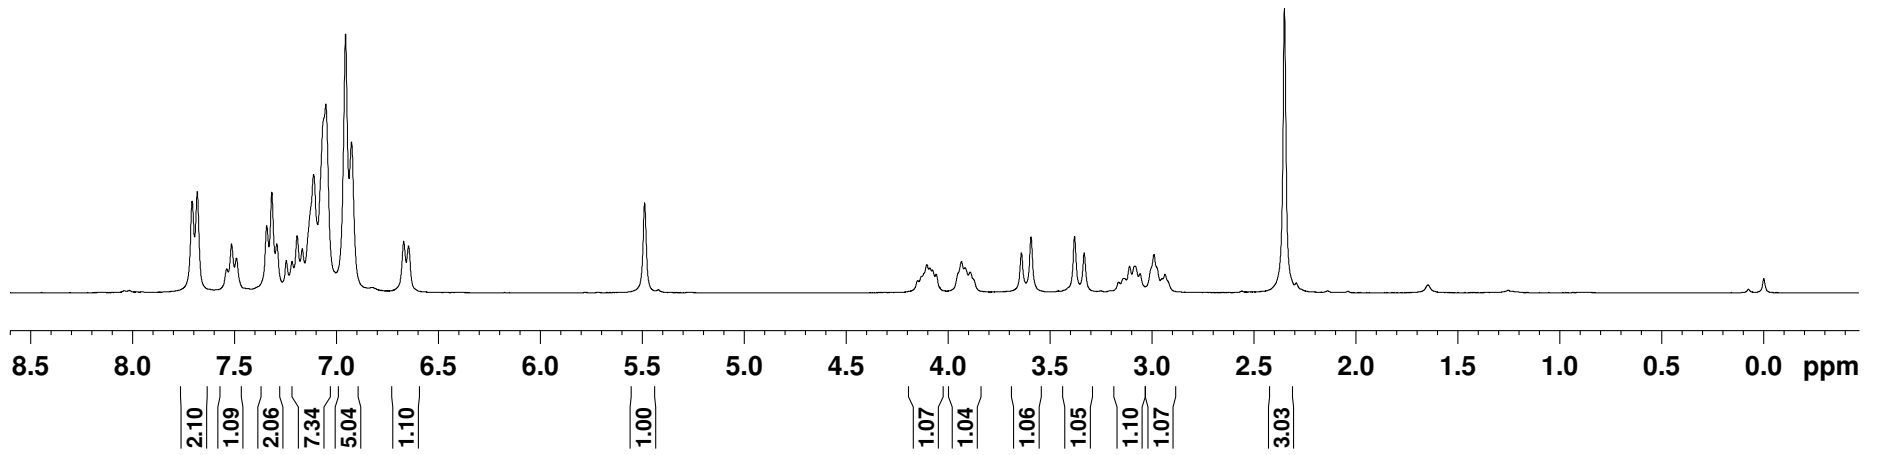

— 193.45

— 185.41

149.45  
139.26  
135.50  
134.67  
133.25  
131.29  
130.00  
129.31  
129.26  
128.56  
128.30  
128.12  
127.63  
127.12  
127.05  
125.98  
125.10  
119.66  
115.53  
111.99

— 95.66

77.42  
77.00  
76.57

— 63.26

— 42.88  
— 39.86

— 26.02  
— 21.91

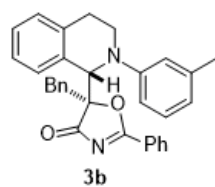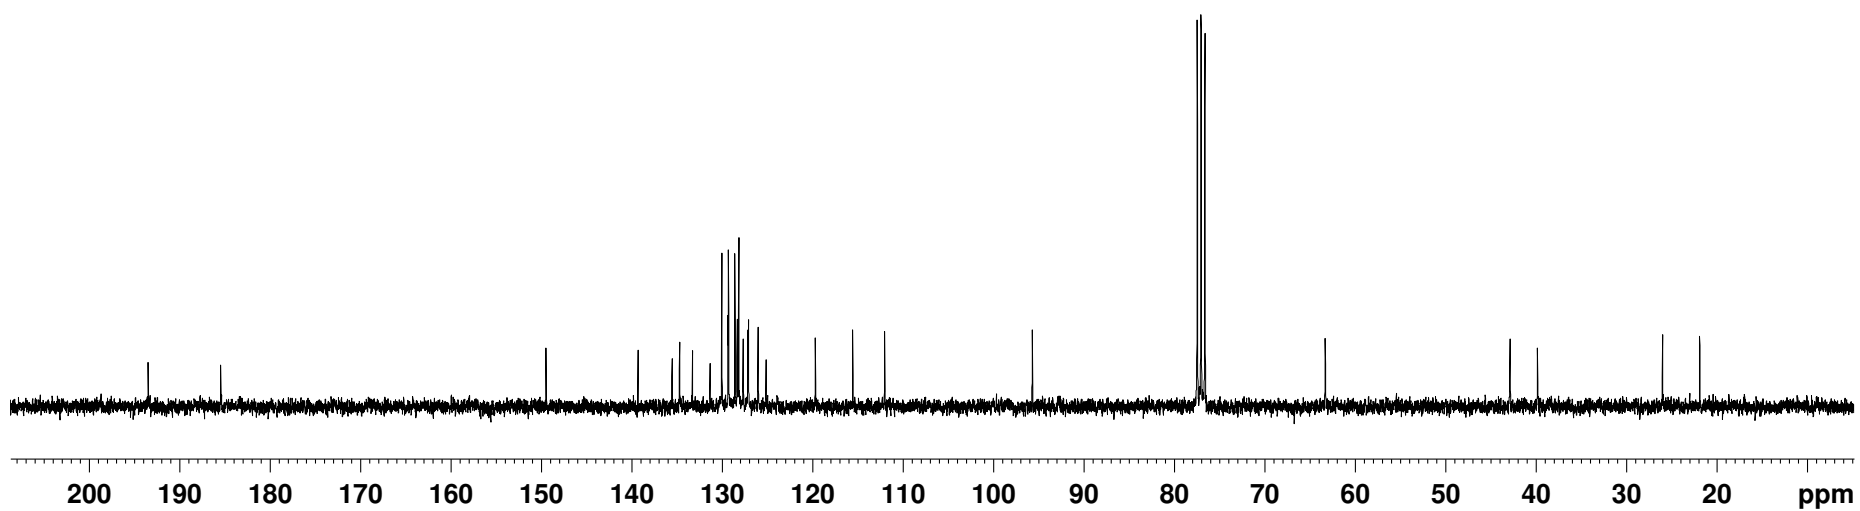

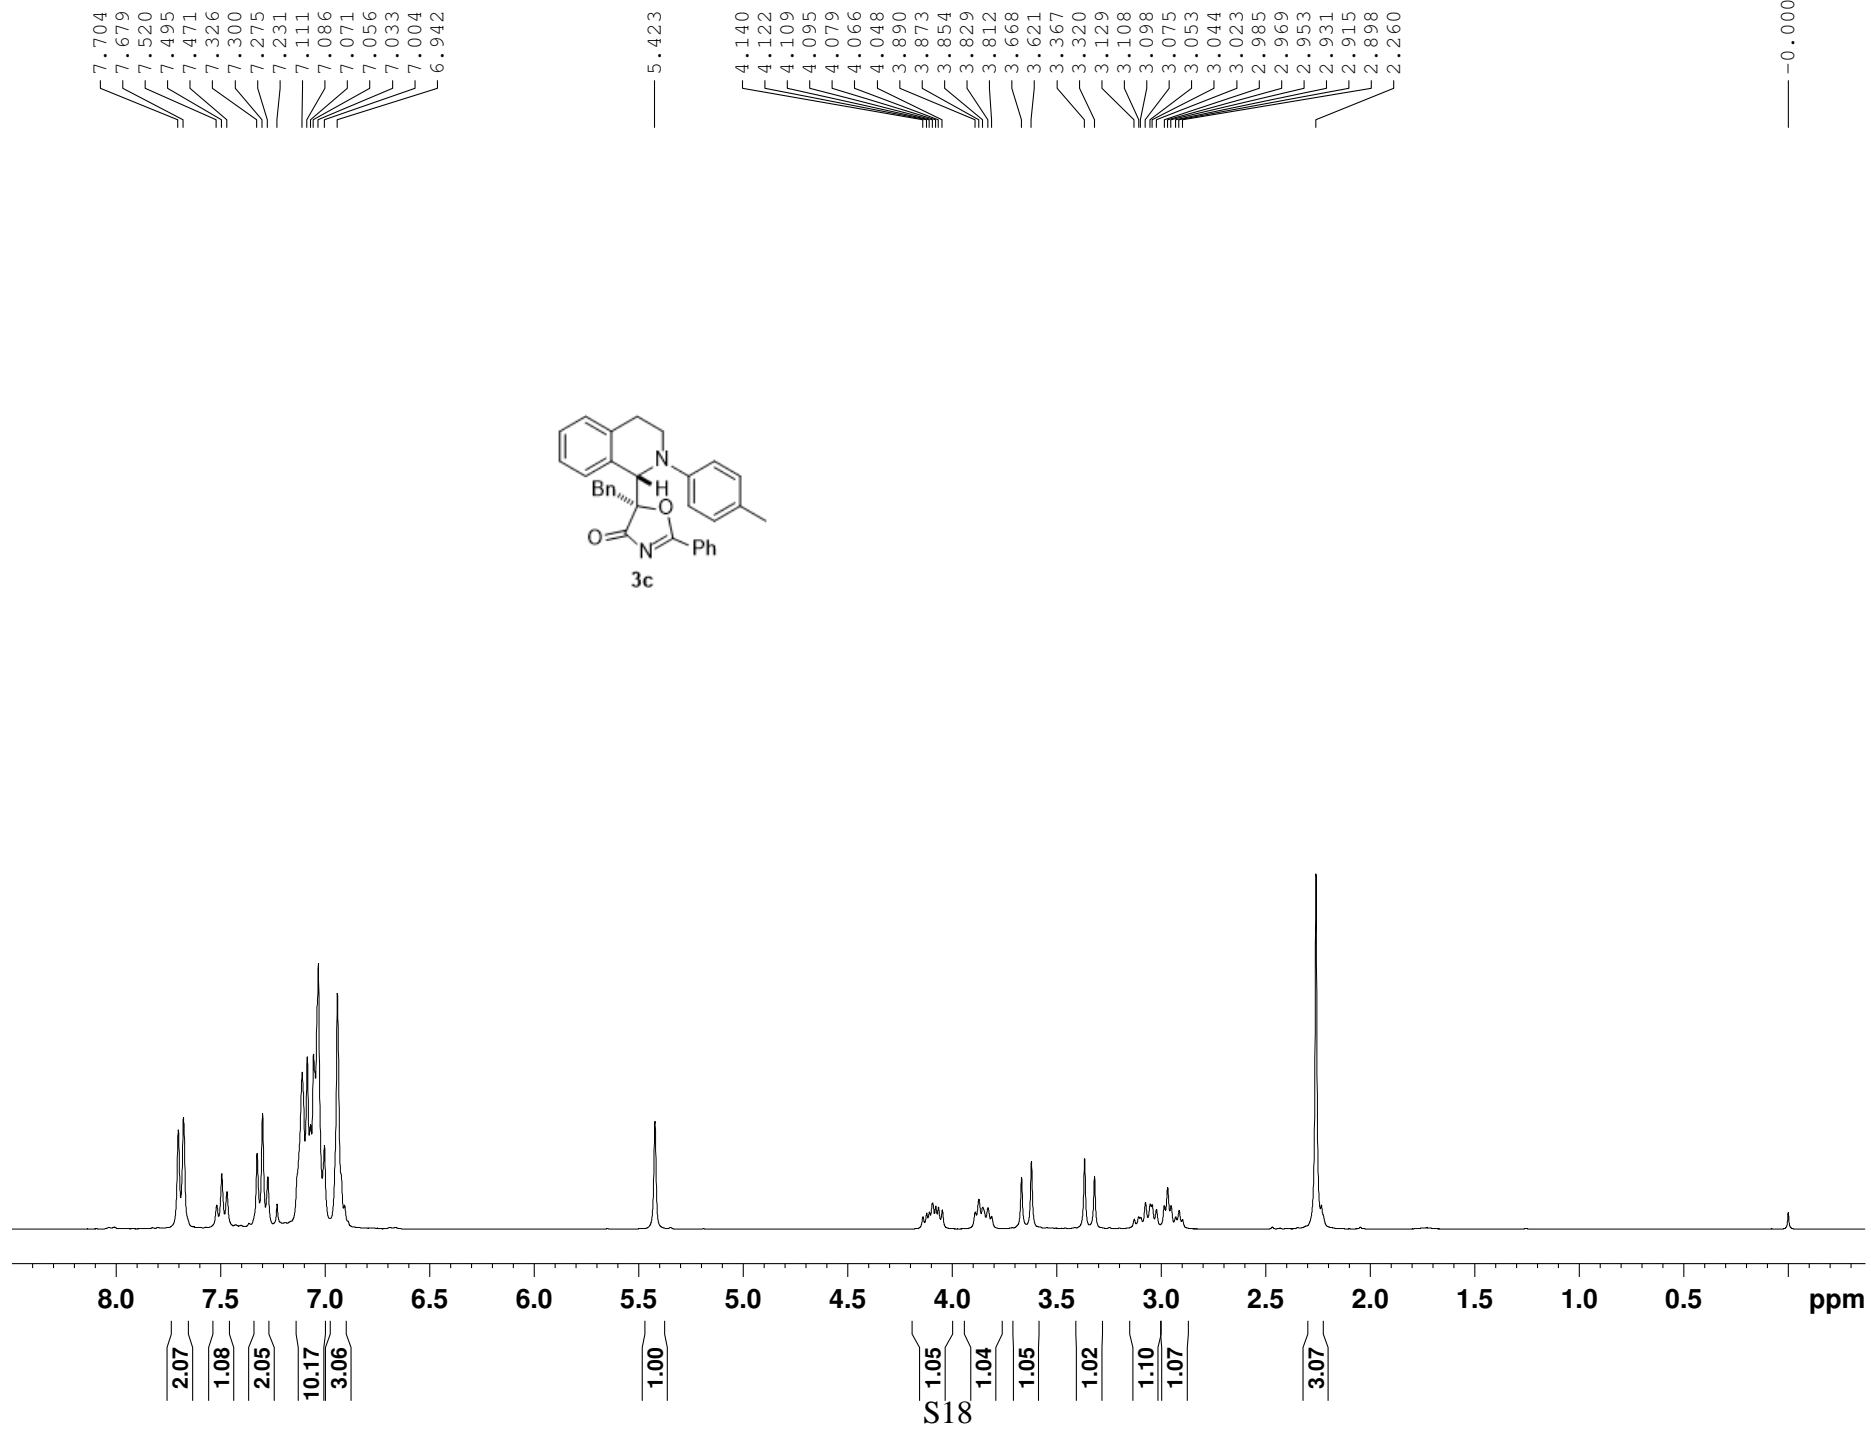

— 193.45

— 185.38

147.25  
135.56  
134.63  
133.29  
131.26  
129.97  
129.92  
129.23  
128.53  
128.26  
128.17  
128.09  
127.57  
127.07  
127.04  
125.96  
125.08  
115.22

— 95.69

77.43  
77.00  
76.58

— 63.40

— 43.30  
— 39.83

— 25.84  
— 20.24

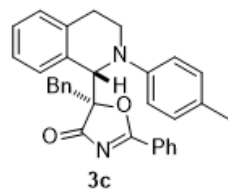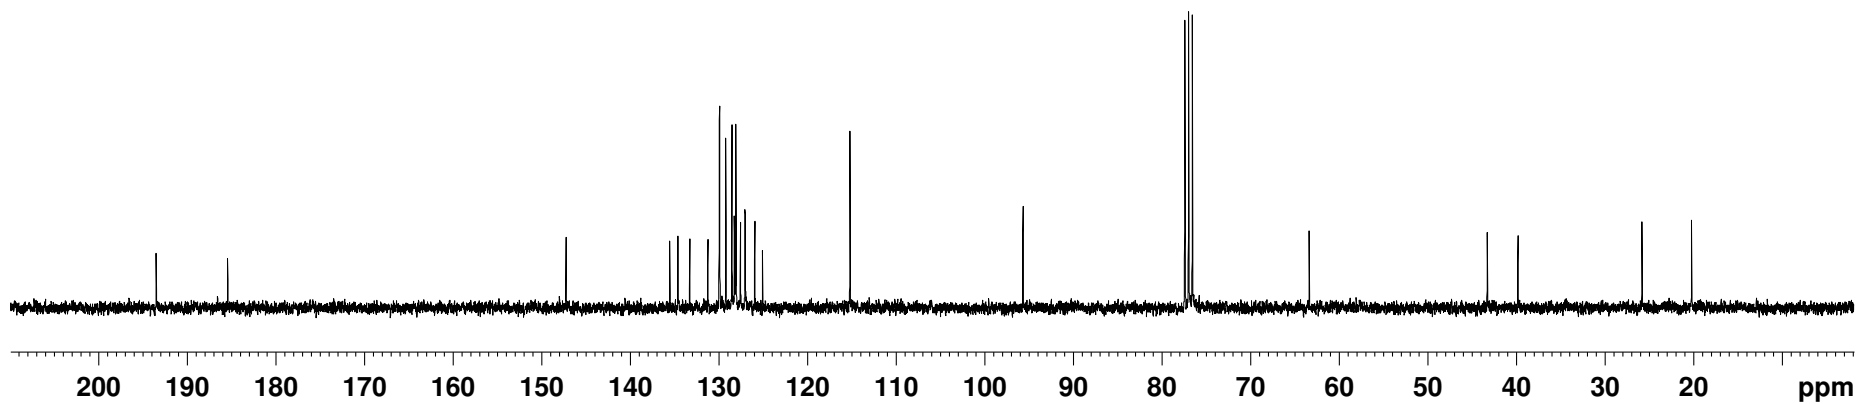

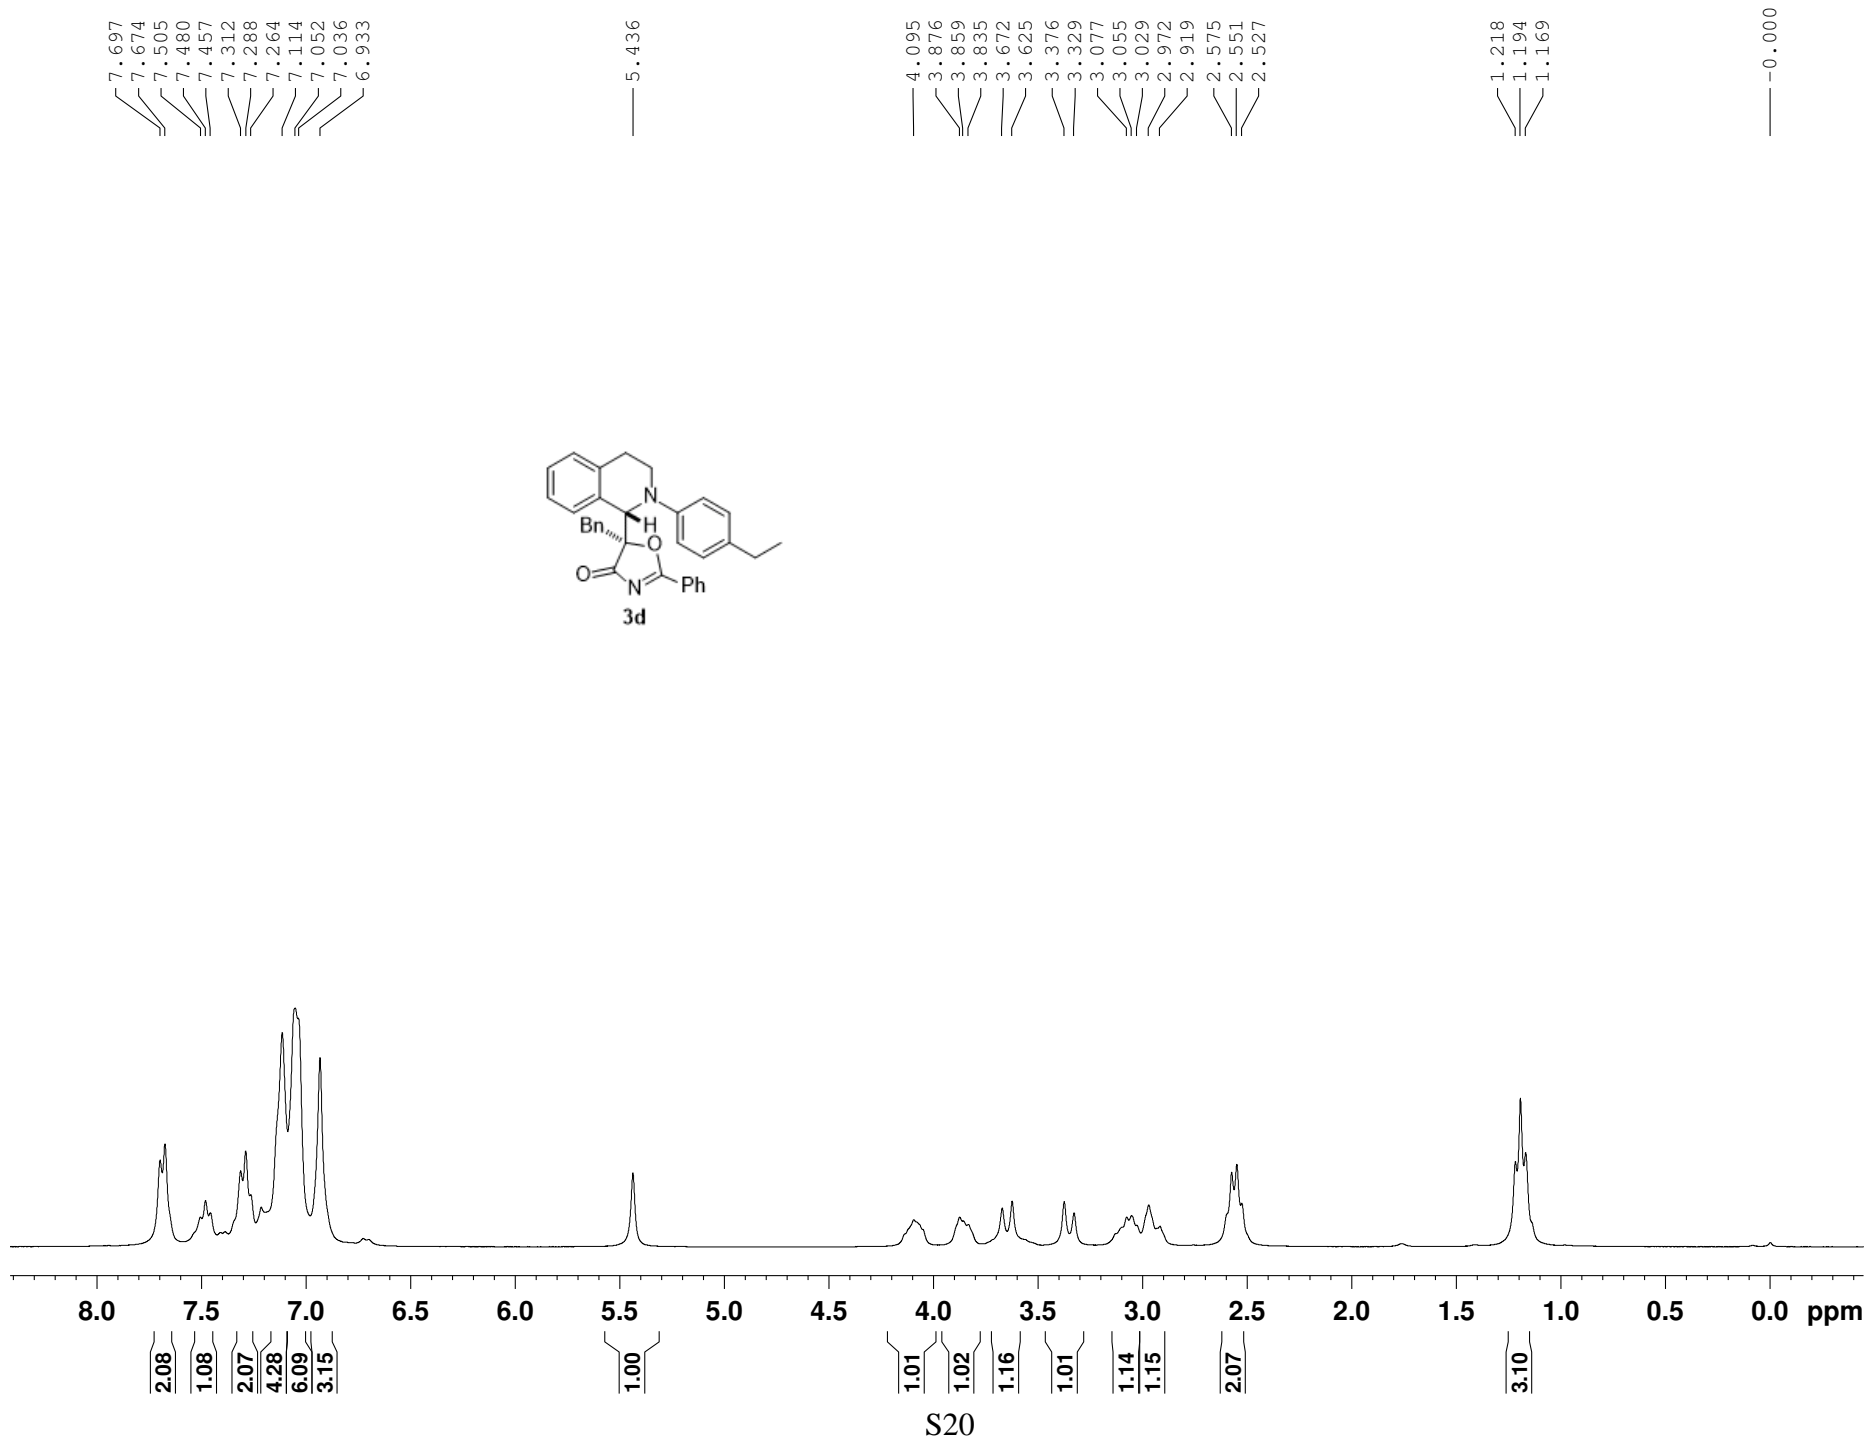

— 193.45

— 185.37

147.40  
135.55  
134.61  
133.28  
131.28  
129.96  
129.20  
128.71  
128.50  
128.39  
128.24  
128.06  
127.55  
127.05  
127.00  
126.90  
125.92  
125.06  
115.12

— 95.65

77.42  
77.00  
76.58

— 63.44

— 43.23  
— 39.82

— 27.71  
— 25.87

— 15.77

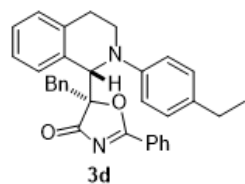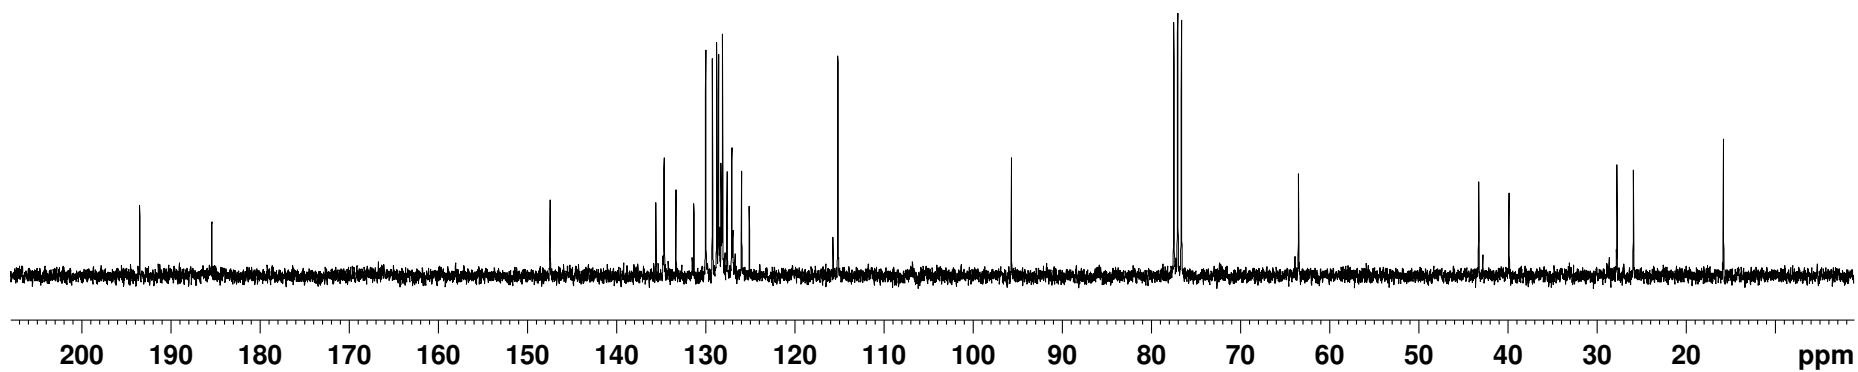

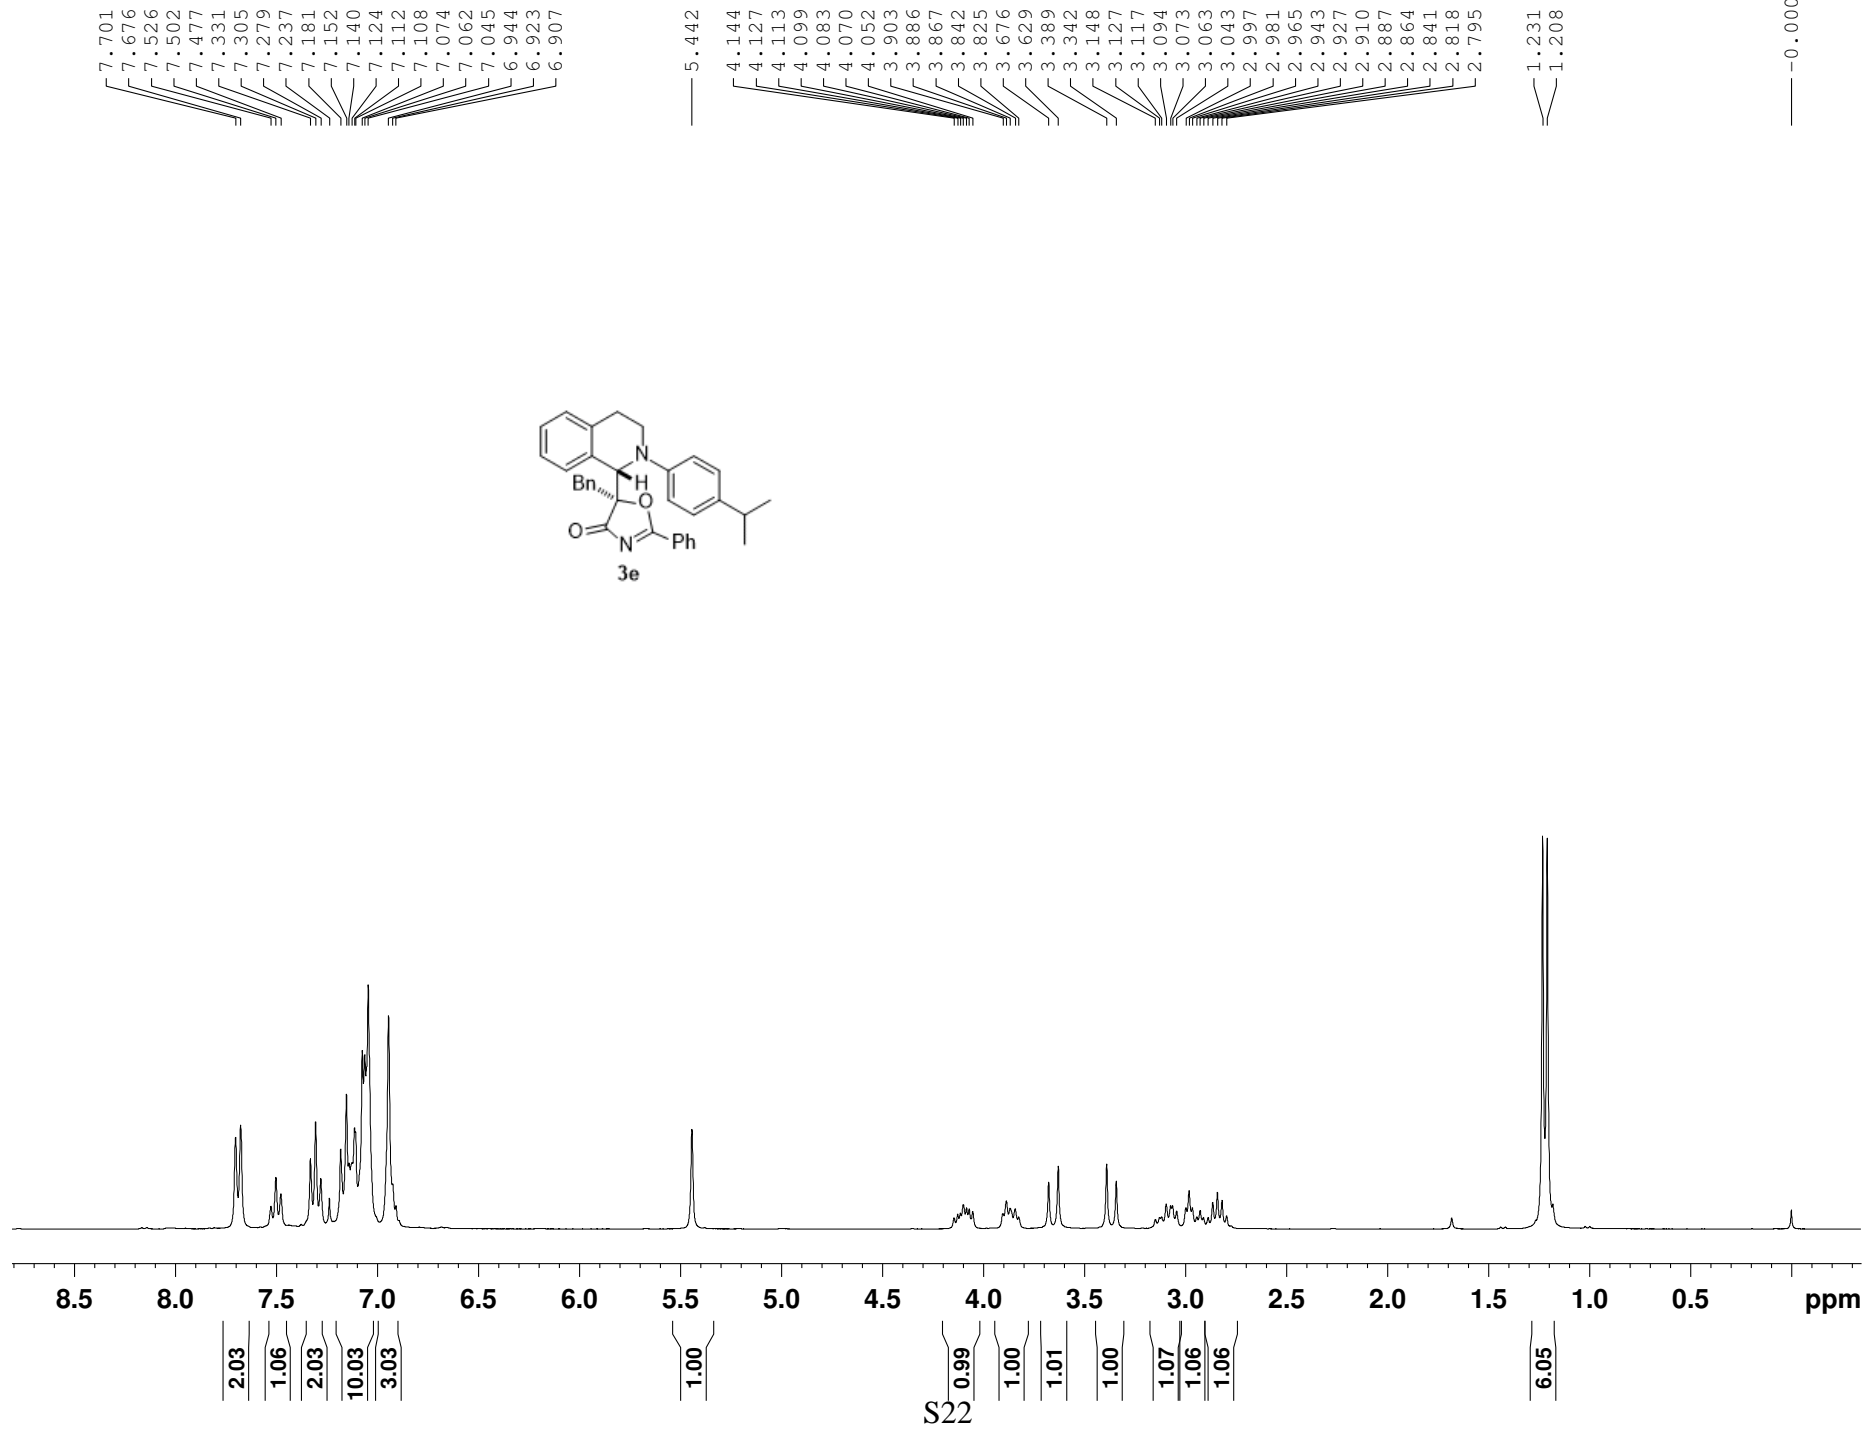

— 193.48

— 185.39

147.47  
139.26  
135.58  
134.63  
133.32  
131.34  
129.99  
129.24  
128.54  
128.25  
128.11  
127.58  
127.28  
127.08  
127.05  
125.97  
125.12  
114.98

— 95.67

77.42  
77.00  
76.58

— 63.53

— 43.18

— 39.87

— 33.02

— 25.94

— 24.11

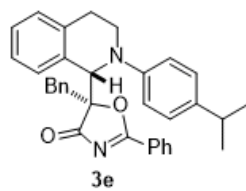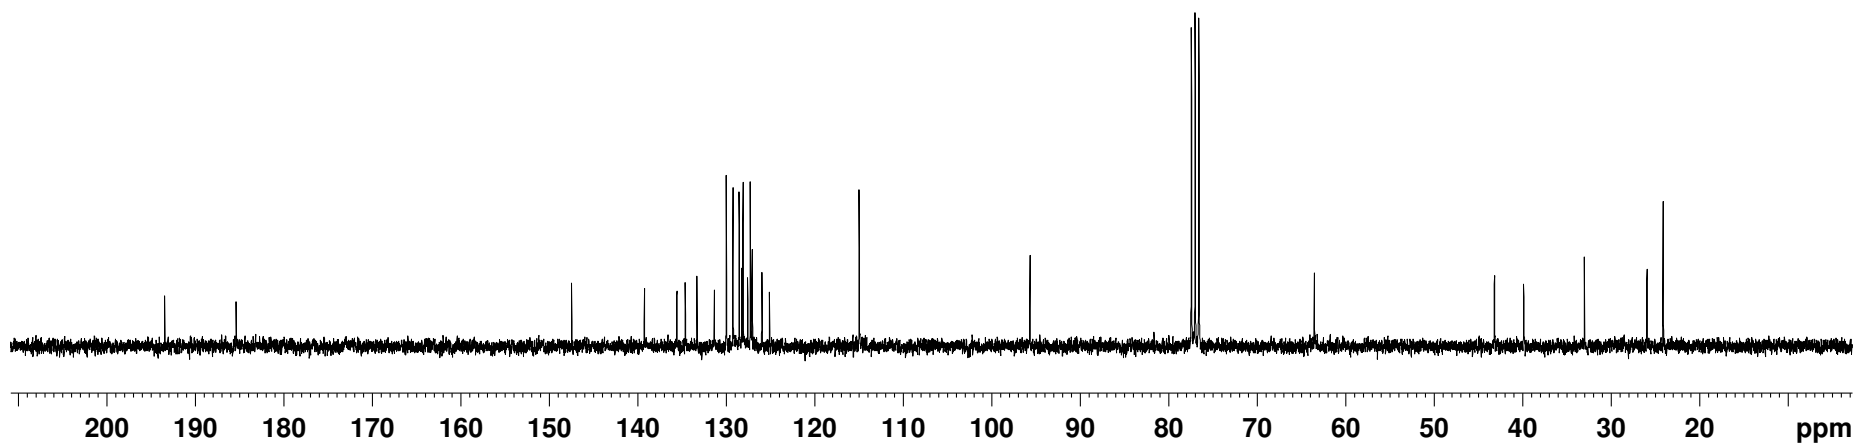

S23



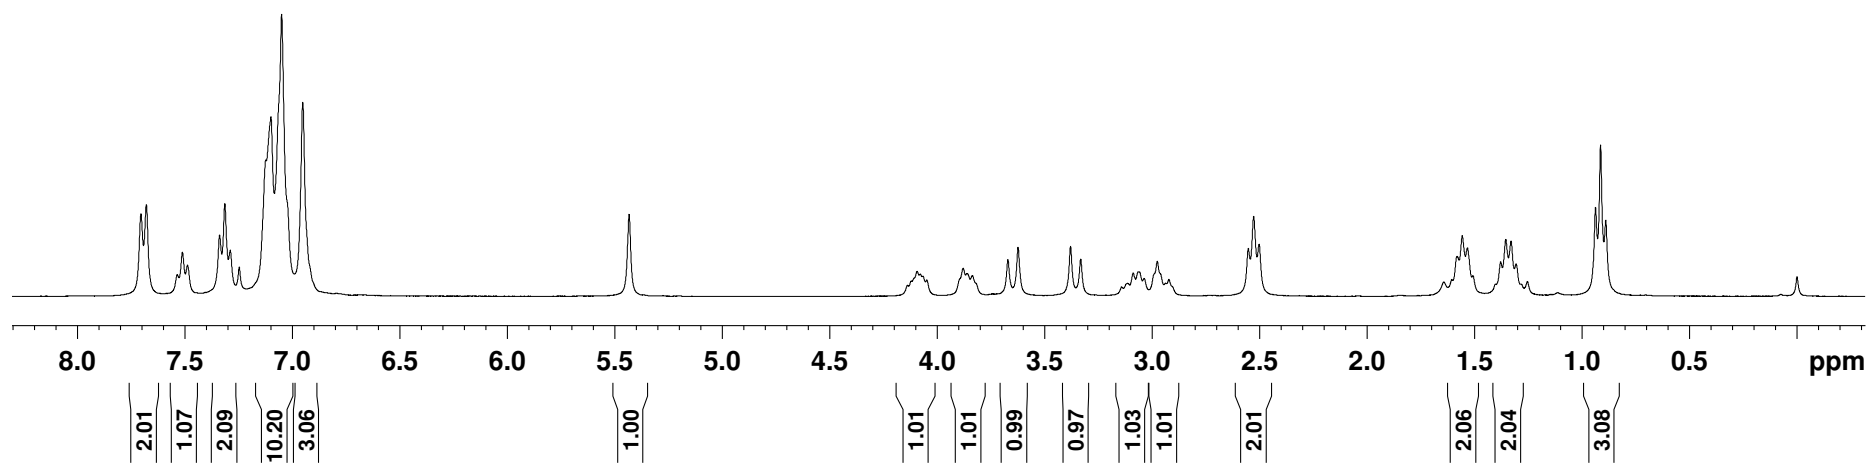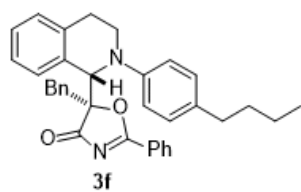

7.704  
7.678  
7.534  
7.510  
7.487  
7.338  
7.313  
7.288  
7.246  
7.123  
7.098  
7.048  
6.950

5.432

4.140  
4.121  
4.094  
4.080  
4.067  
4.048  
3.880  
3.861  
3.837  
3.672  
3.624  
3.380  
3.333  
3.143  
3.114  
3.088  
3.065  
3.038  
2.977  
2.938  
2.923  
2.553  
2.528  
1.644  
1.606  
1.581  
1.558  
1.533  
1.508  
1.403  
1.379  
1.355  
1.331  
1.306  
1.283  
1.254  
0.938  
0.913  
0.890

0.000

— 193.48

— 185.40

147.41  
135.61  
134.64  
133.35  
131.36  
130.02  
129.29  
128.55  
128.27  
128.12  
127.59  
127.09  
125.99  
125.16  
115.08

— 95.72

77.42  
77.00  
76.58

— 63.50

— 43.27

— 39.88

34.54  
33.84

— 25.94

— 22.33

— 13.96

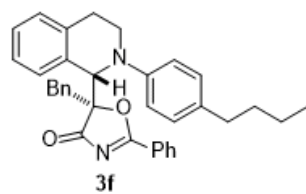

3f

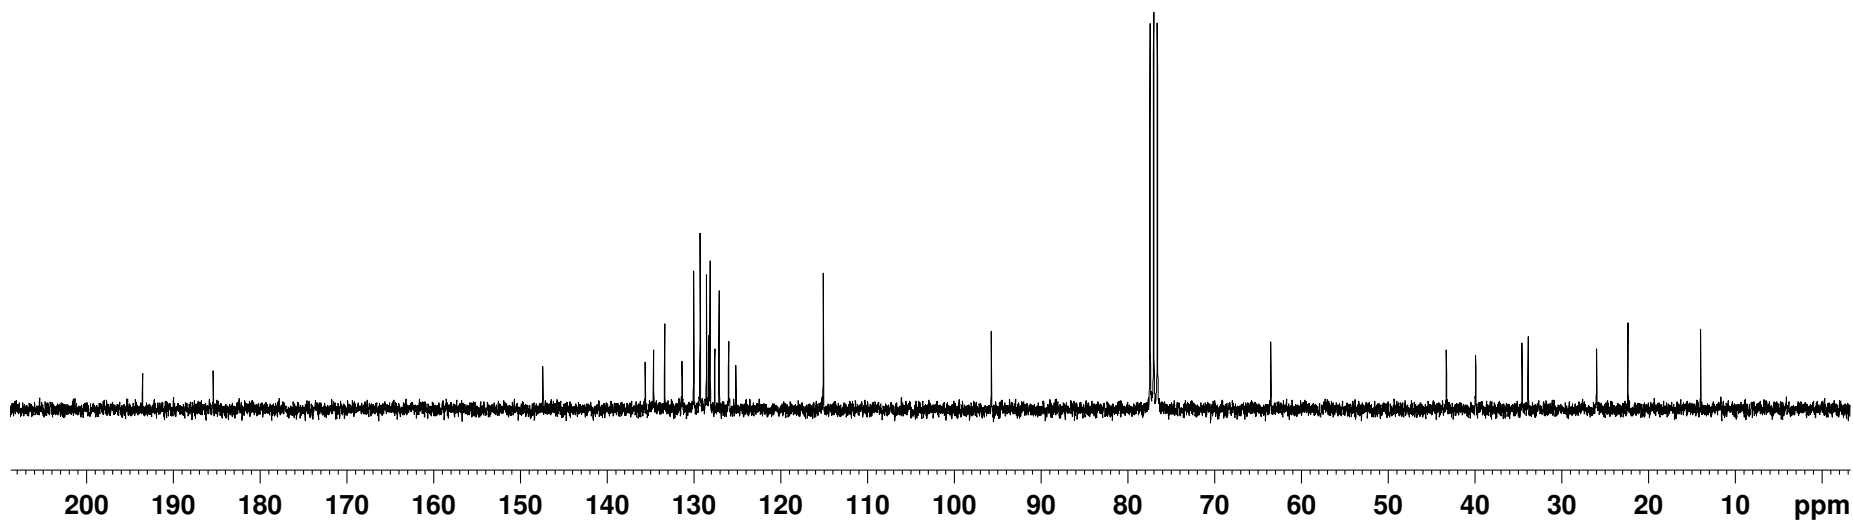

S25

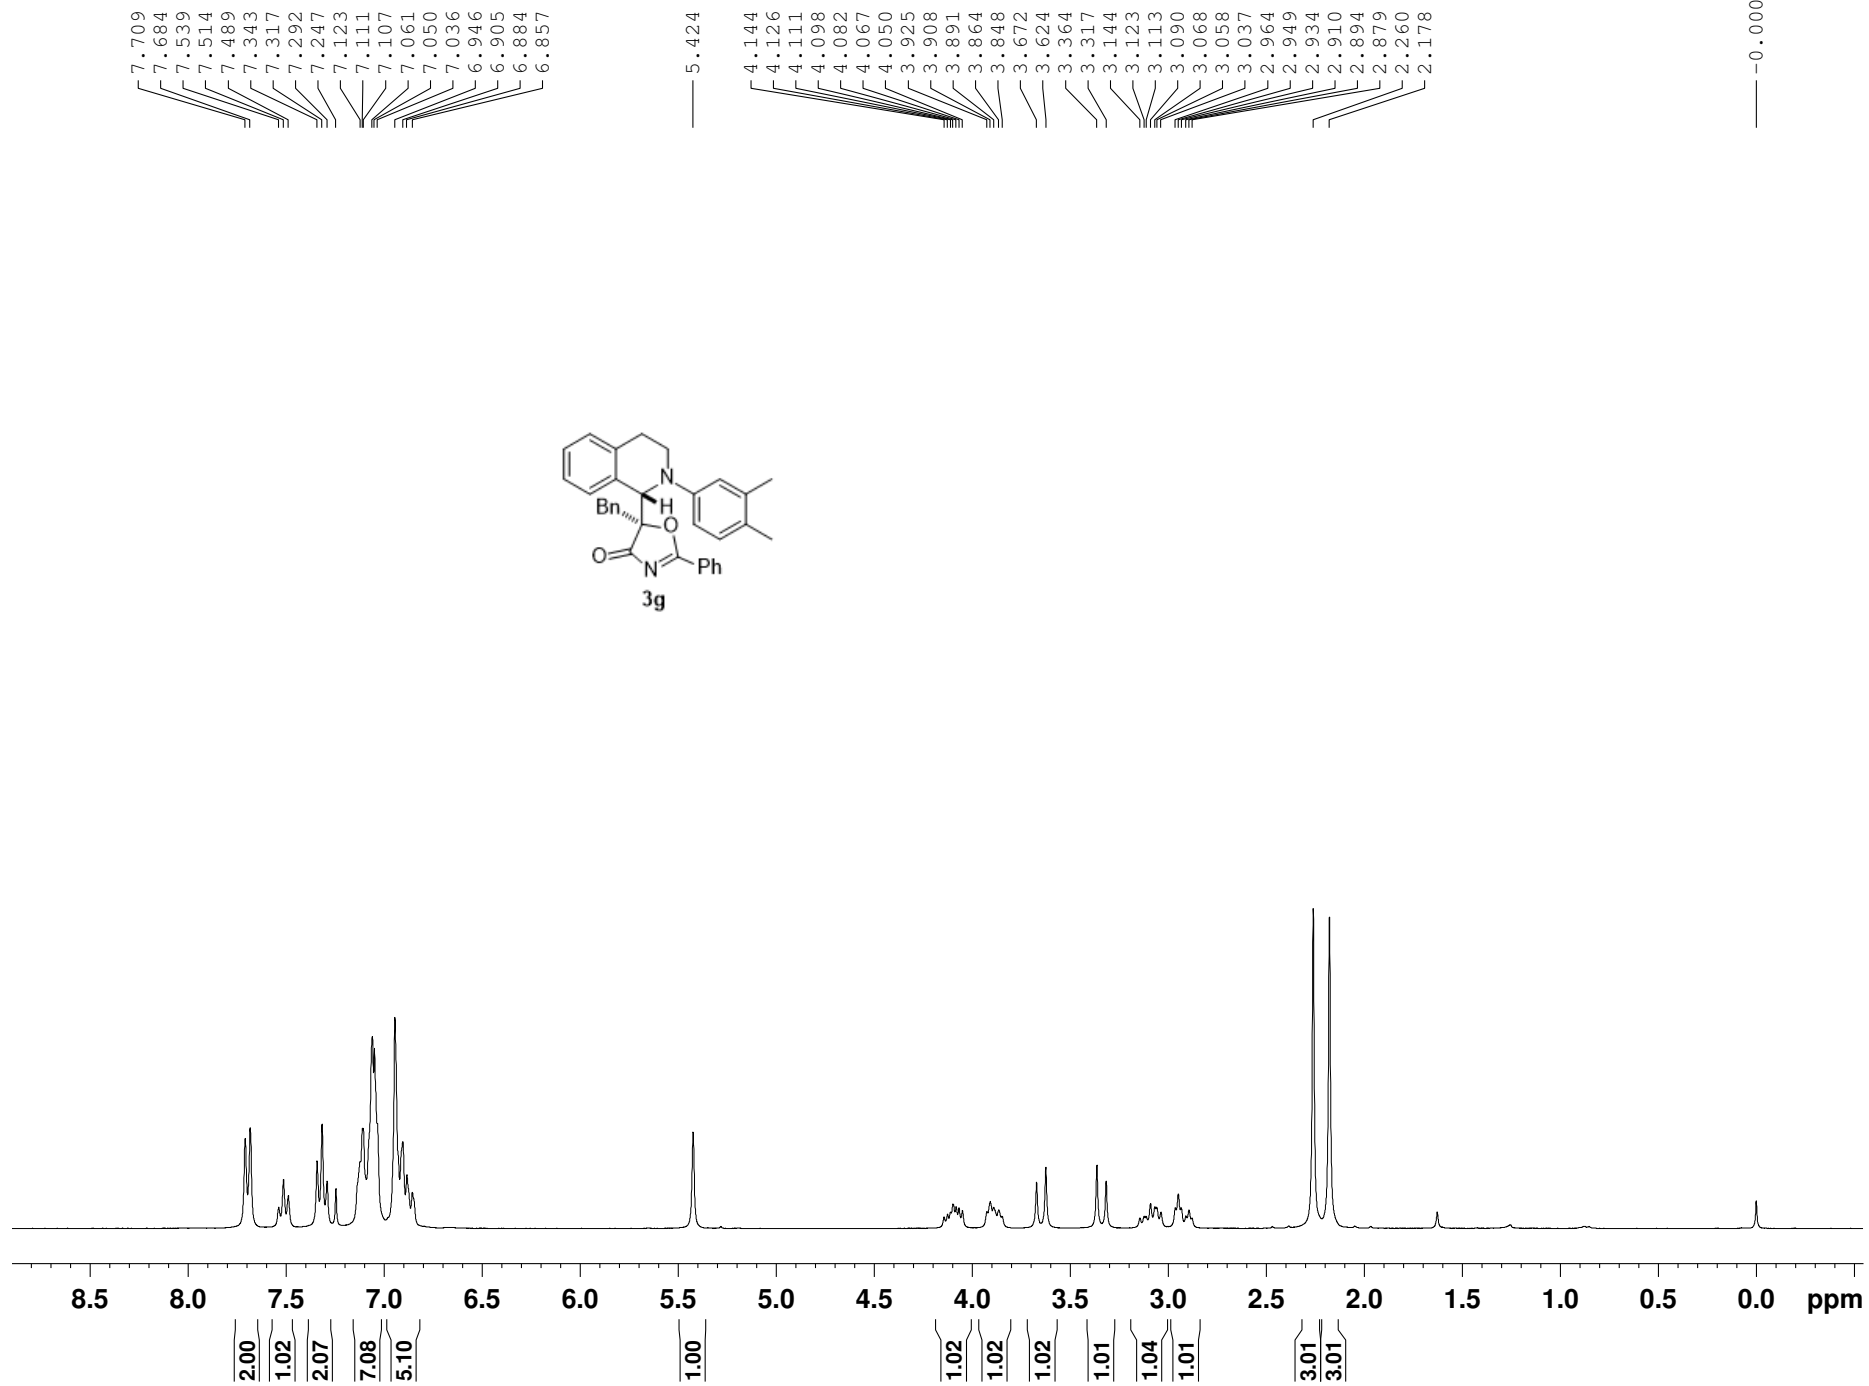

— 193.50

— 185.40

147.69  
137.55  
135.57  
134.63  
133.37  
131.31  
130.45  
130.01  
129.27  
128.55  
128.32  
128.11  
127.55  
127.08  
125.95  
125.17  
116.82  
112.75

— 95.84

77.42  
77.00  
76.57

— 63.36

— 43.18  
— 39.88

— 25.84

— 20.36  
— 18.65

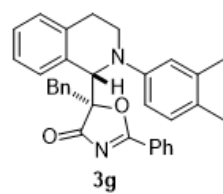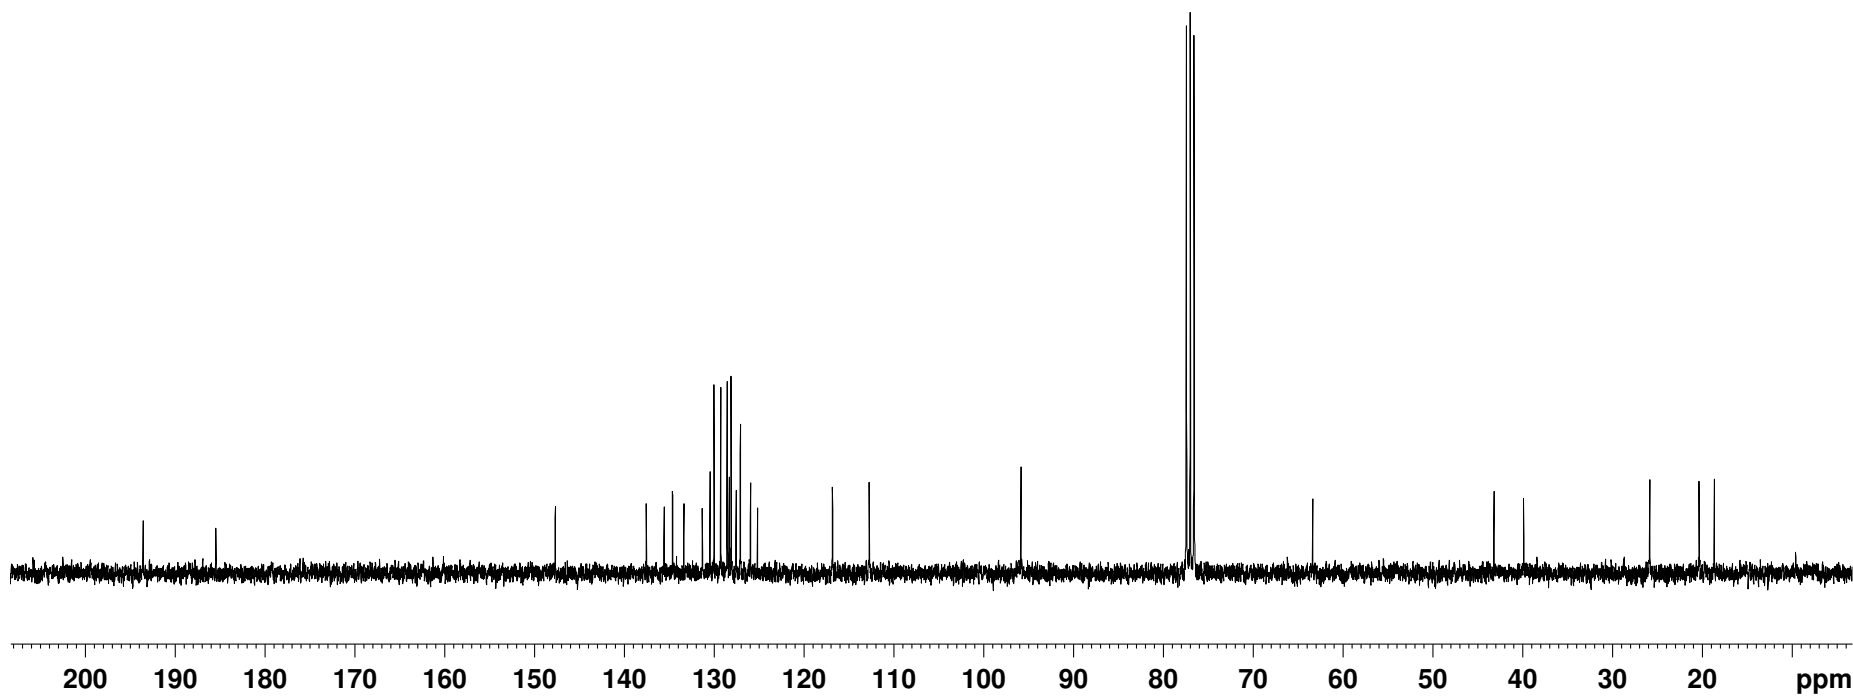

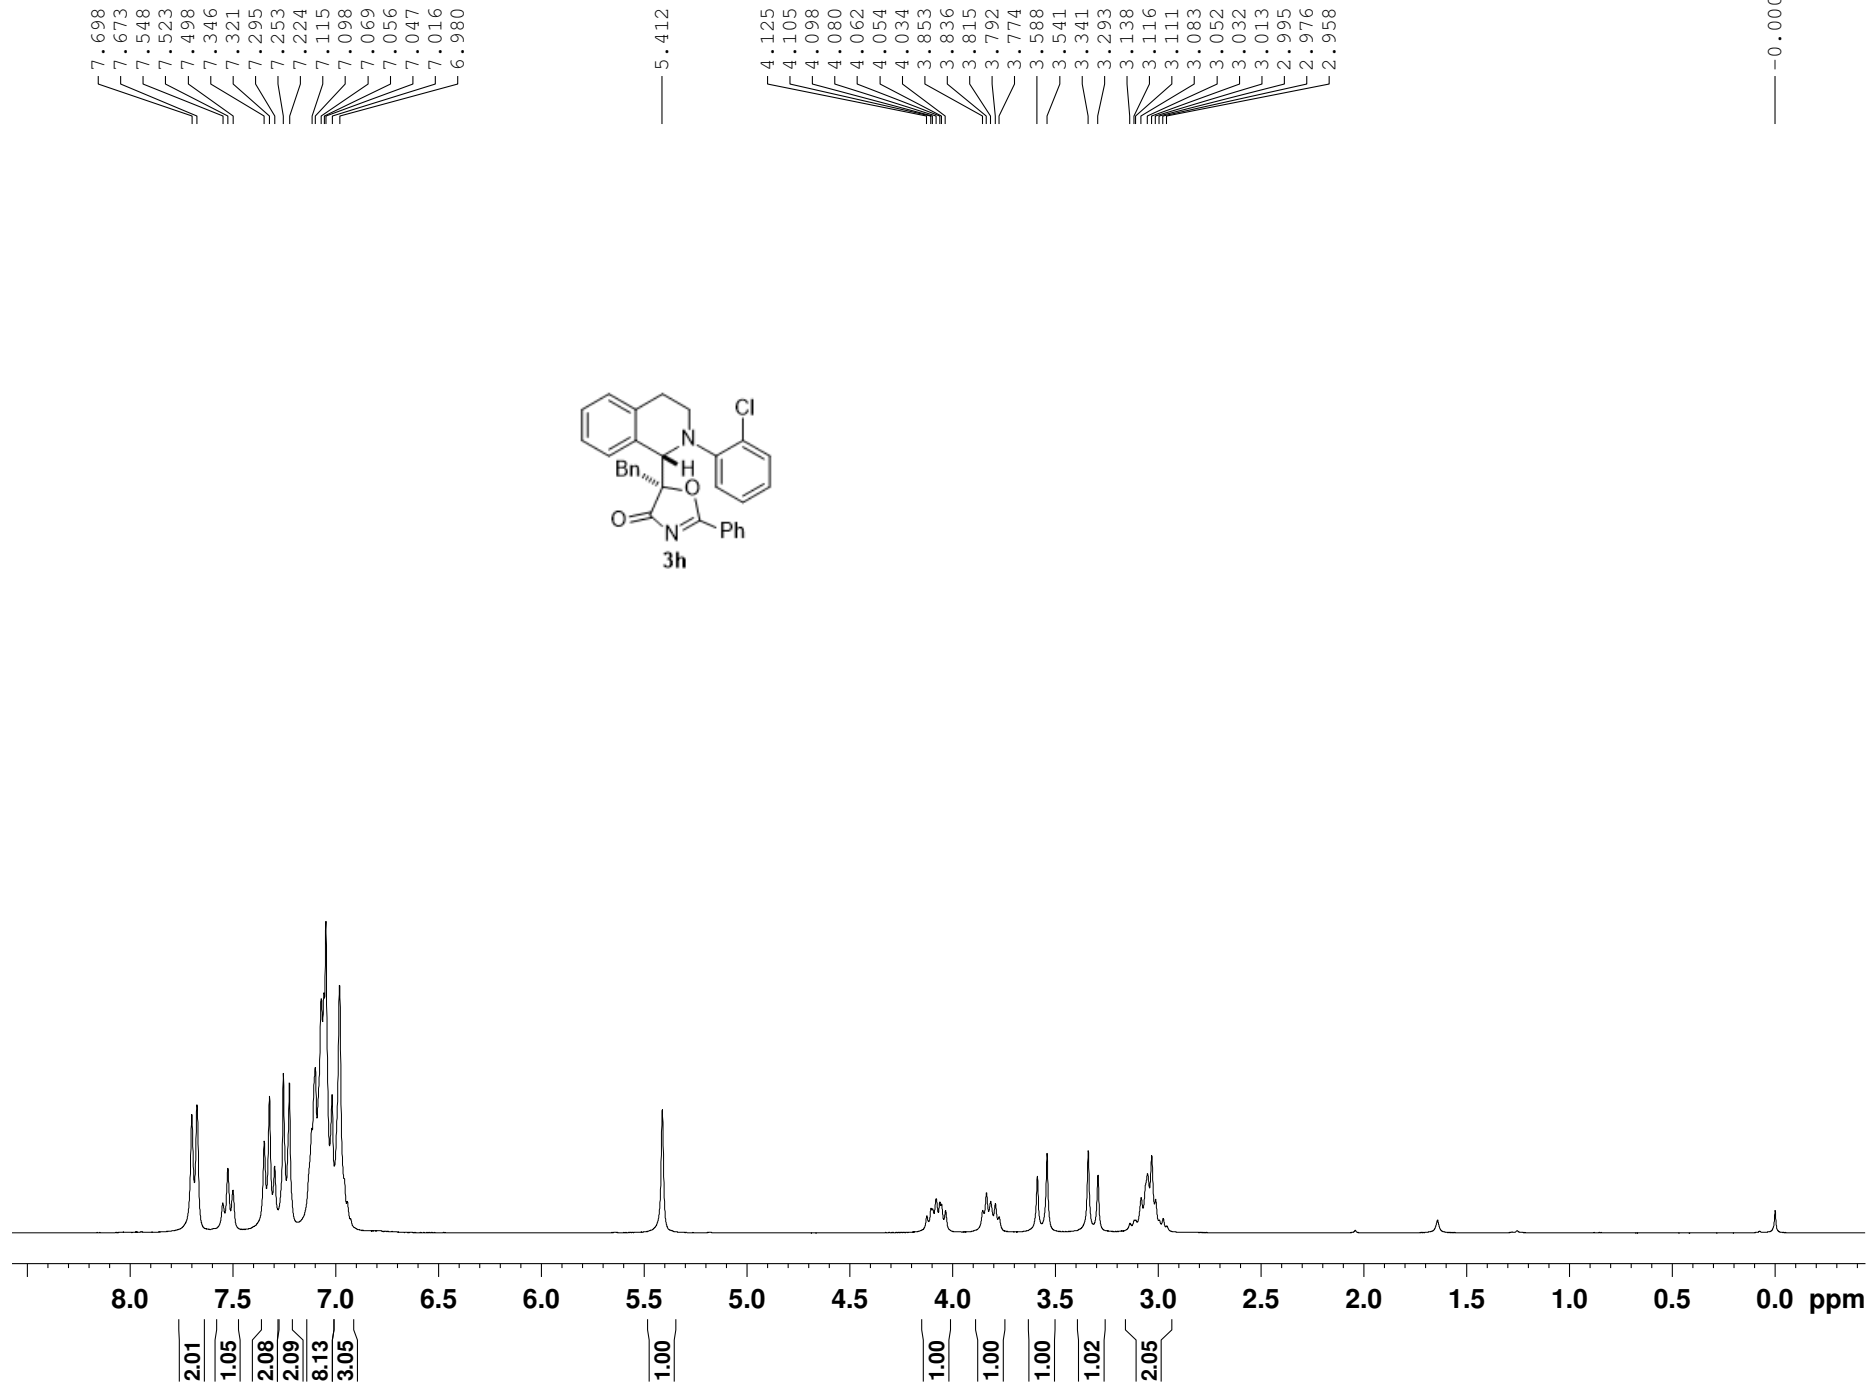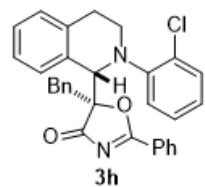

— 193.22

— 185.46

147.99  
135.31  
134.78  
132.99  
130.93  
129.98  
129.28  
129.26  
128.60  
128.26  
128.18  
127.88  
127.23  
127.05  
126.20  
124.99  
123.55  
115.99

— 95.23

77.42  
77.00  
76.57

— 63.35

— 43.35

— 39.80

— 26.03

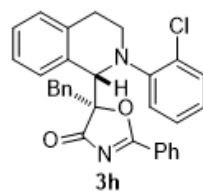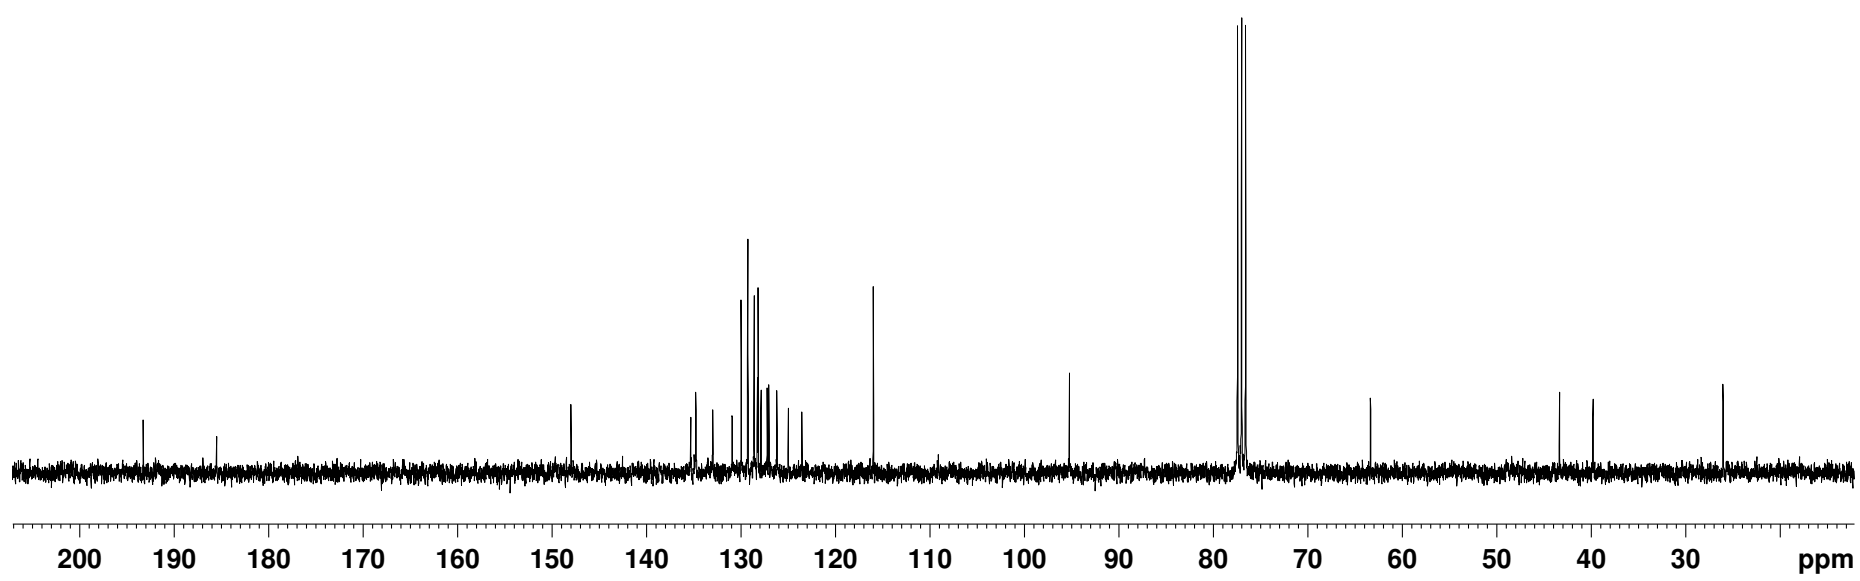

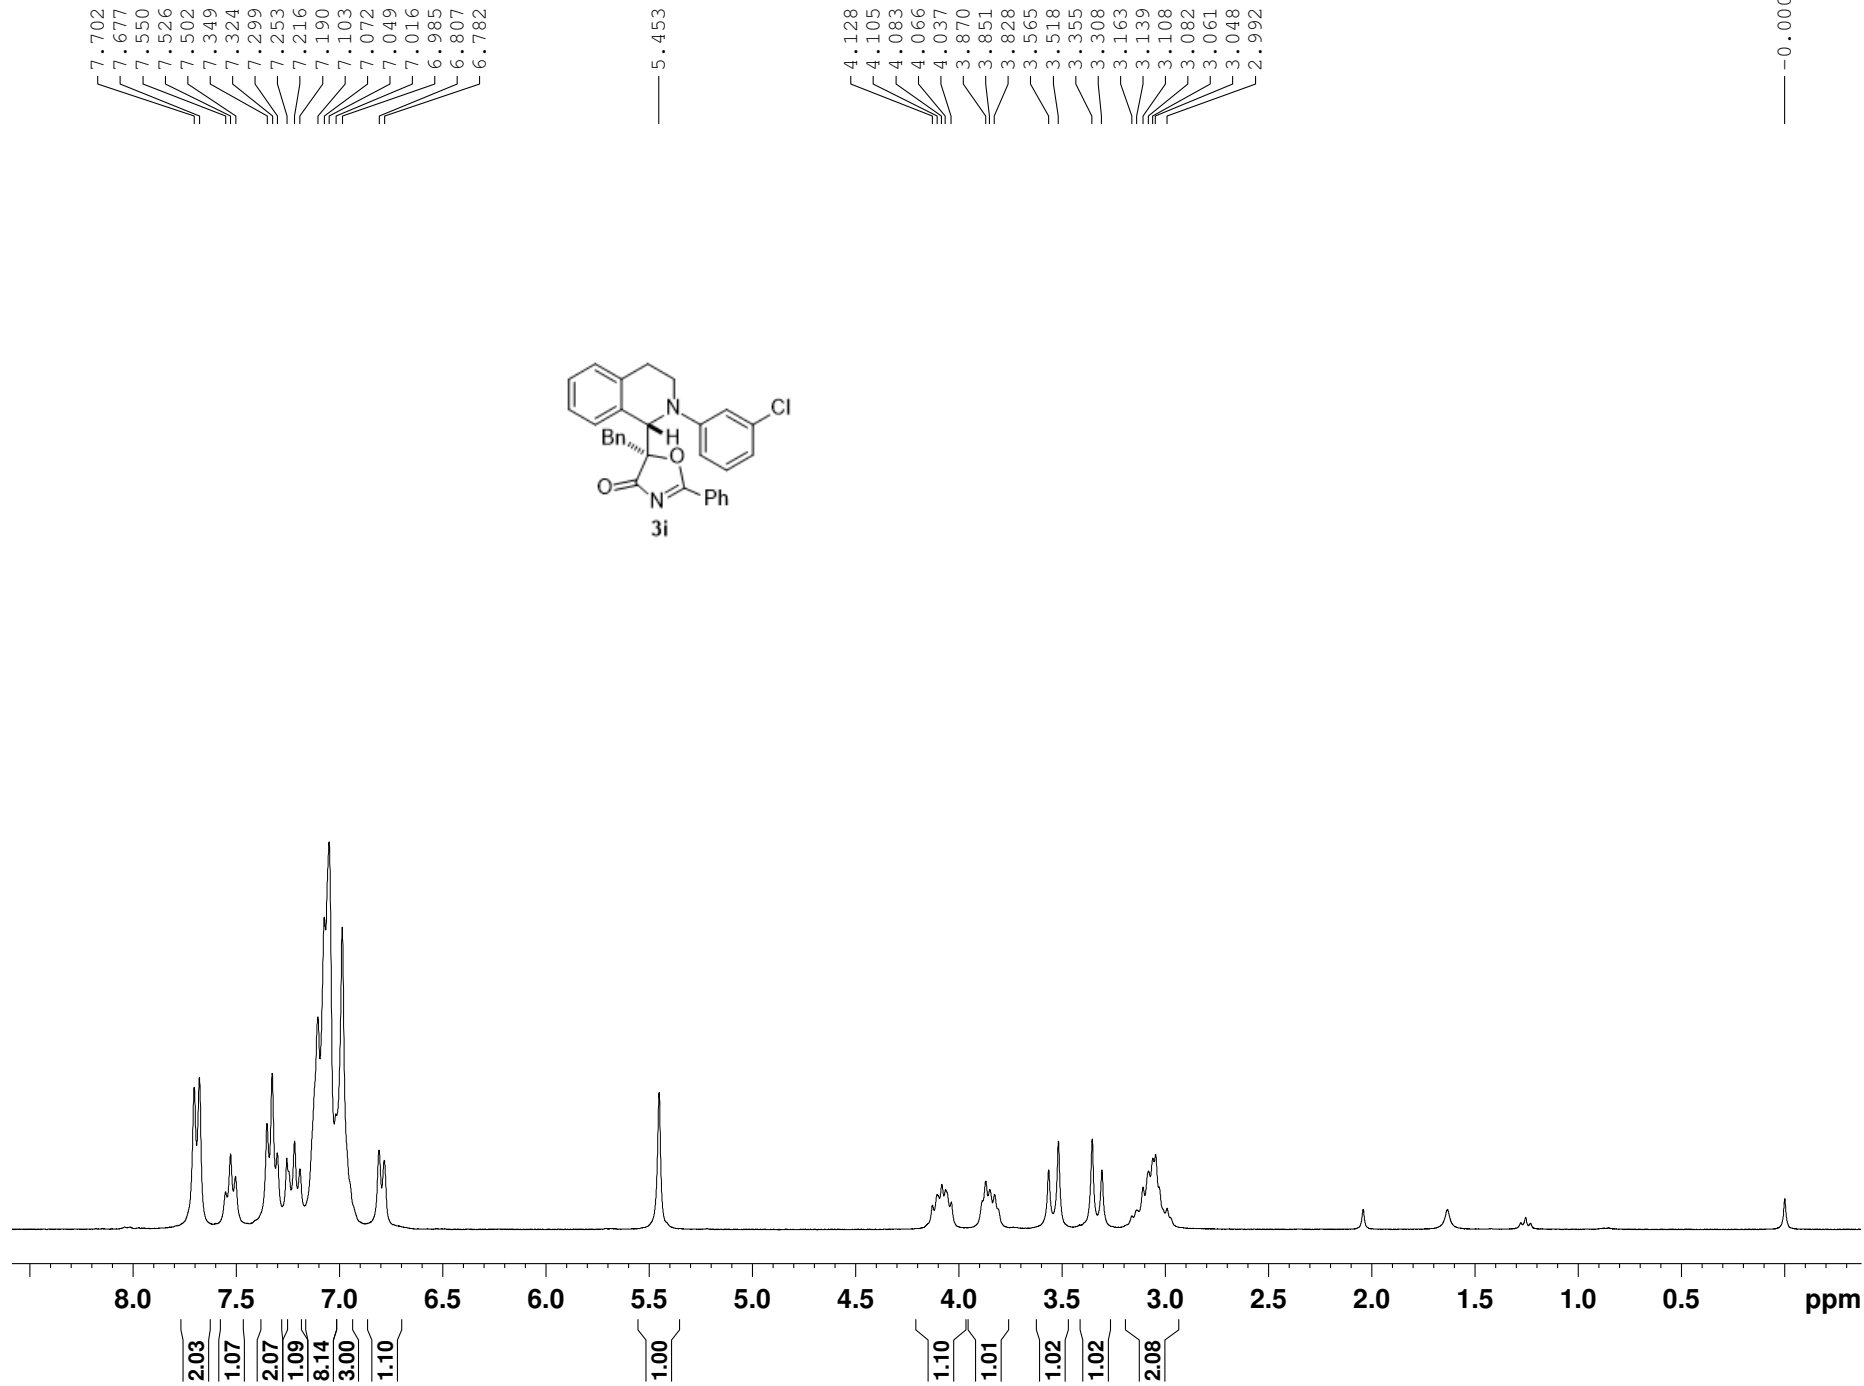

S30

— 193.12

— 185.46

150.46  
135.34  
135.23  
134.79  
132.93  
130.86  
130.42  
129.99  
129.30  
128.61  
128.30  
128.19  
127.93  
127.25  
127.08  
126.21  
124.99  
118.55  
114.45  
112.74

— 95.16

77.42  
77.00  
76.57

— 63.20

— 43.03  
— 39.81

— 26.12

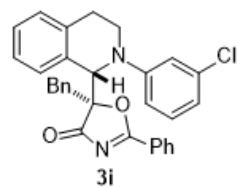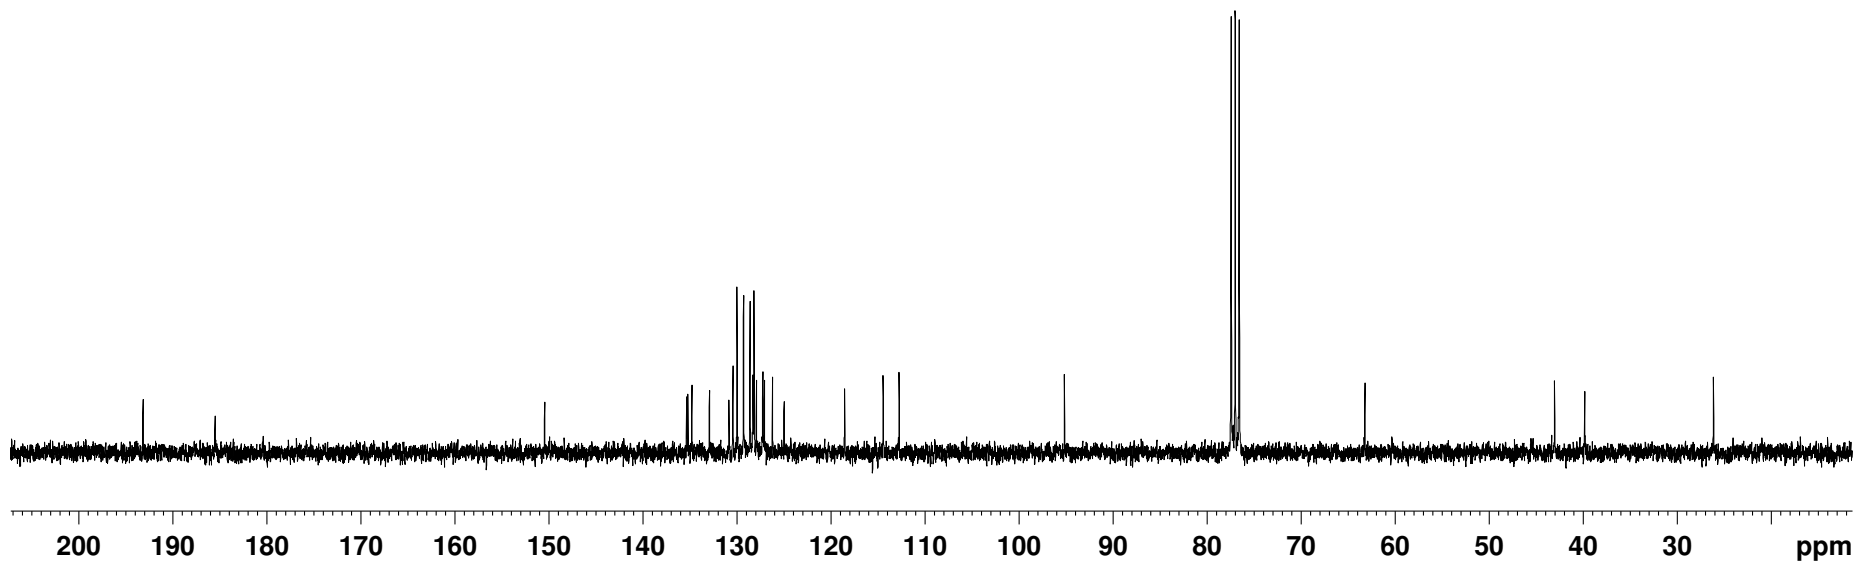

S31



7.698  
7.673  
7.546  
7.524  
7.500  
7.346  
7.321  
7.297  
7.253  
7.225  
7.098  
7.048  
7.017  
6.981

5.412

4.124  
4.103  
4.080  
4.061  
4.035  
3.836  
3.815  
3.793  
3.588  
3.541  
3.341  
3.294  
3.135  
3.083  
3.052  
3.033  
2.977

0.000

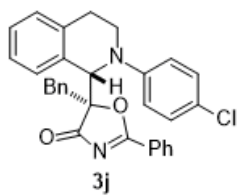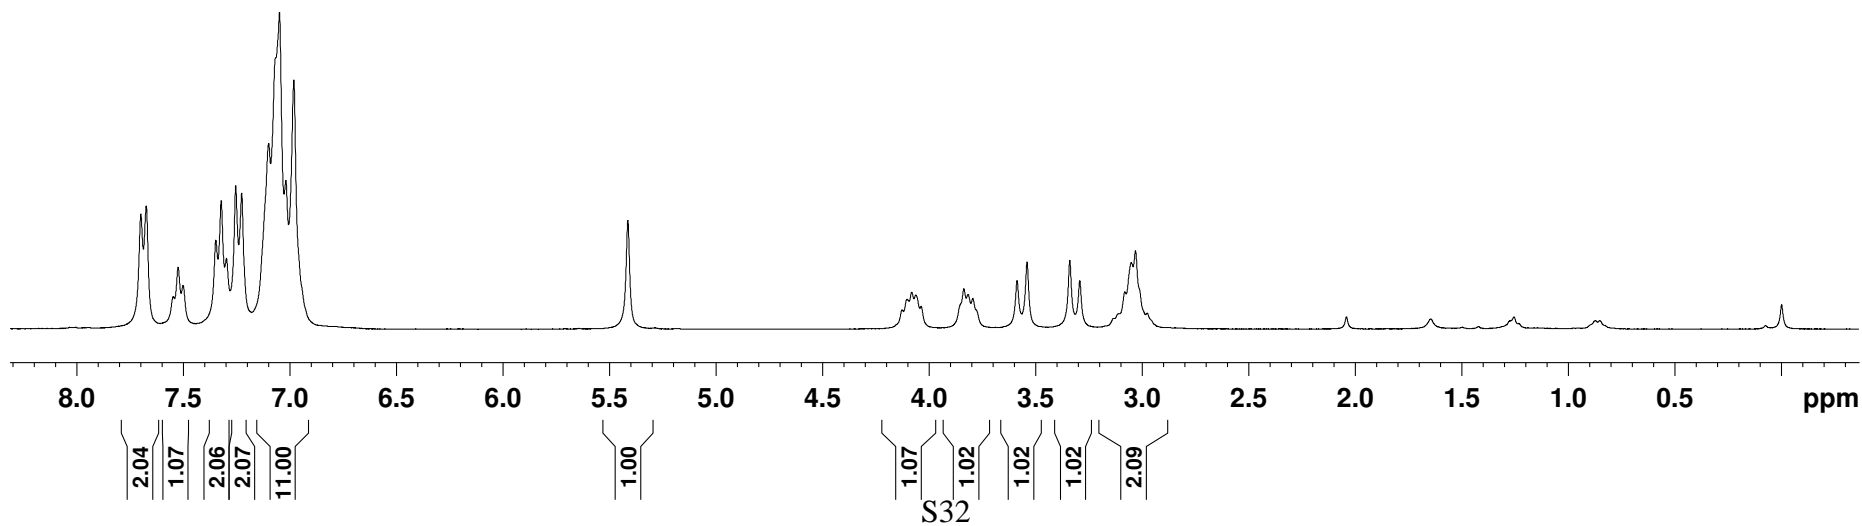

— 193.23

— 185.46

147.99  
135.31  
134.78  
132.99  
130.93  
129.98  
129.26  
128.60  
128.26  
128.18  
127.88  
127.23  
127.05  
126.20  
124.99  
123.55  
115.99

— 95.23

77.42  
77.00  
76.58

— 63.35

— 43.35  
— 39.80

— 26.03

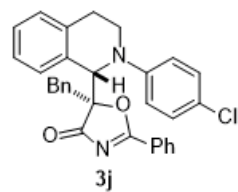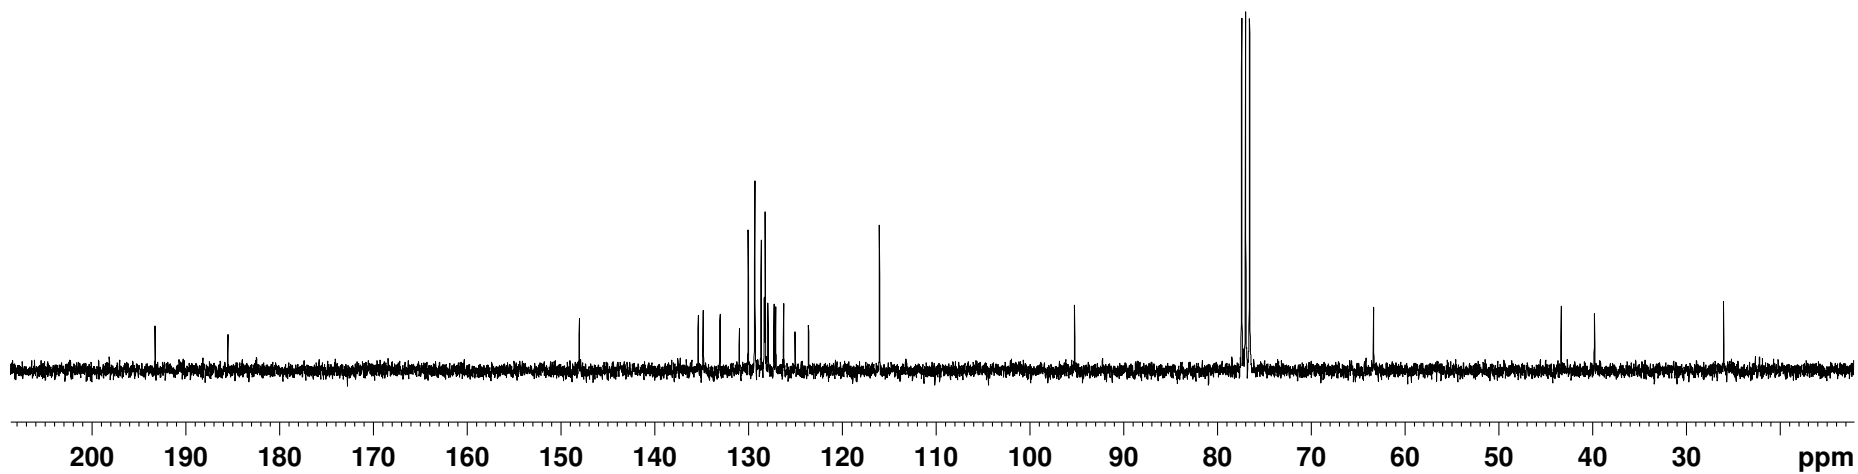

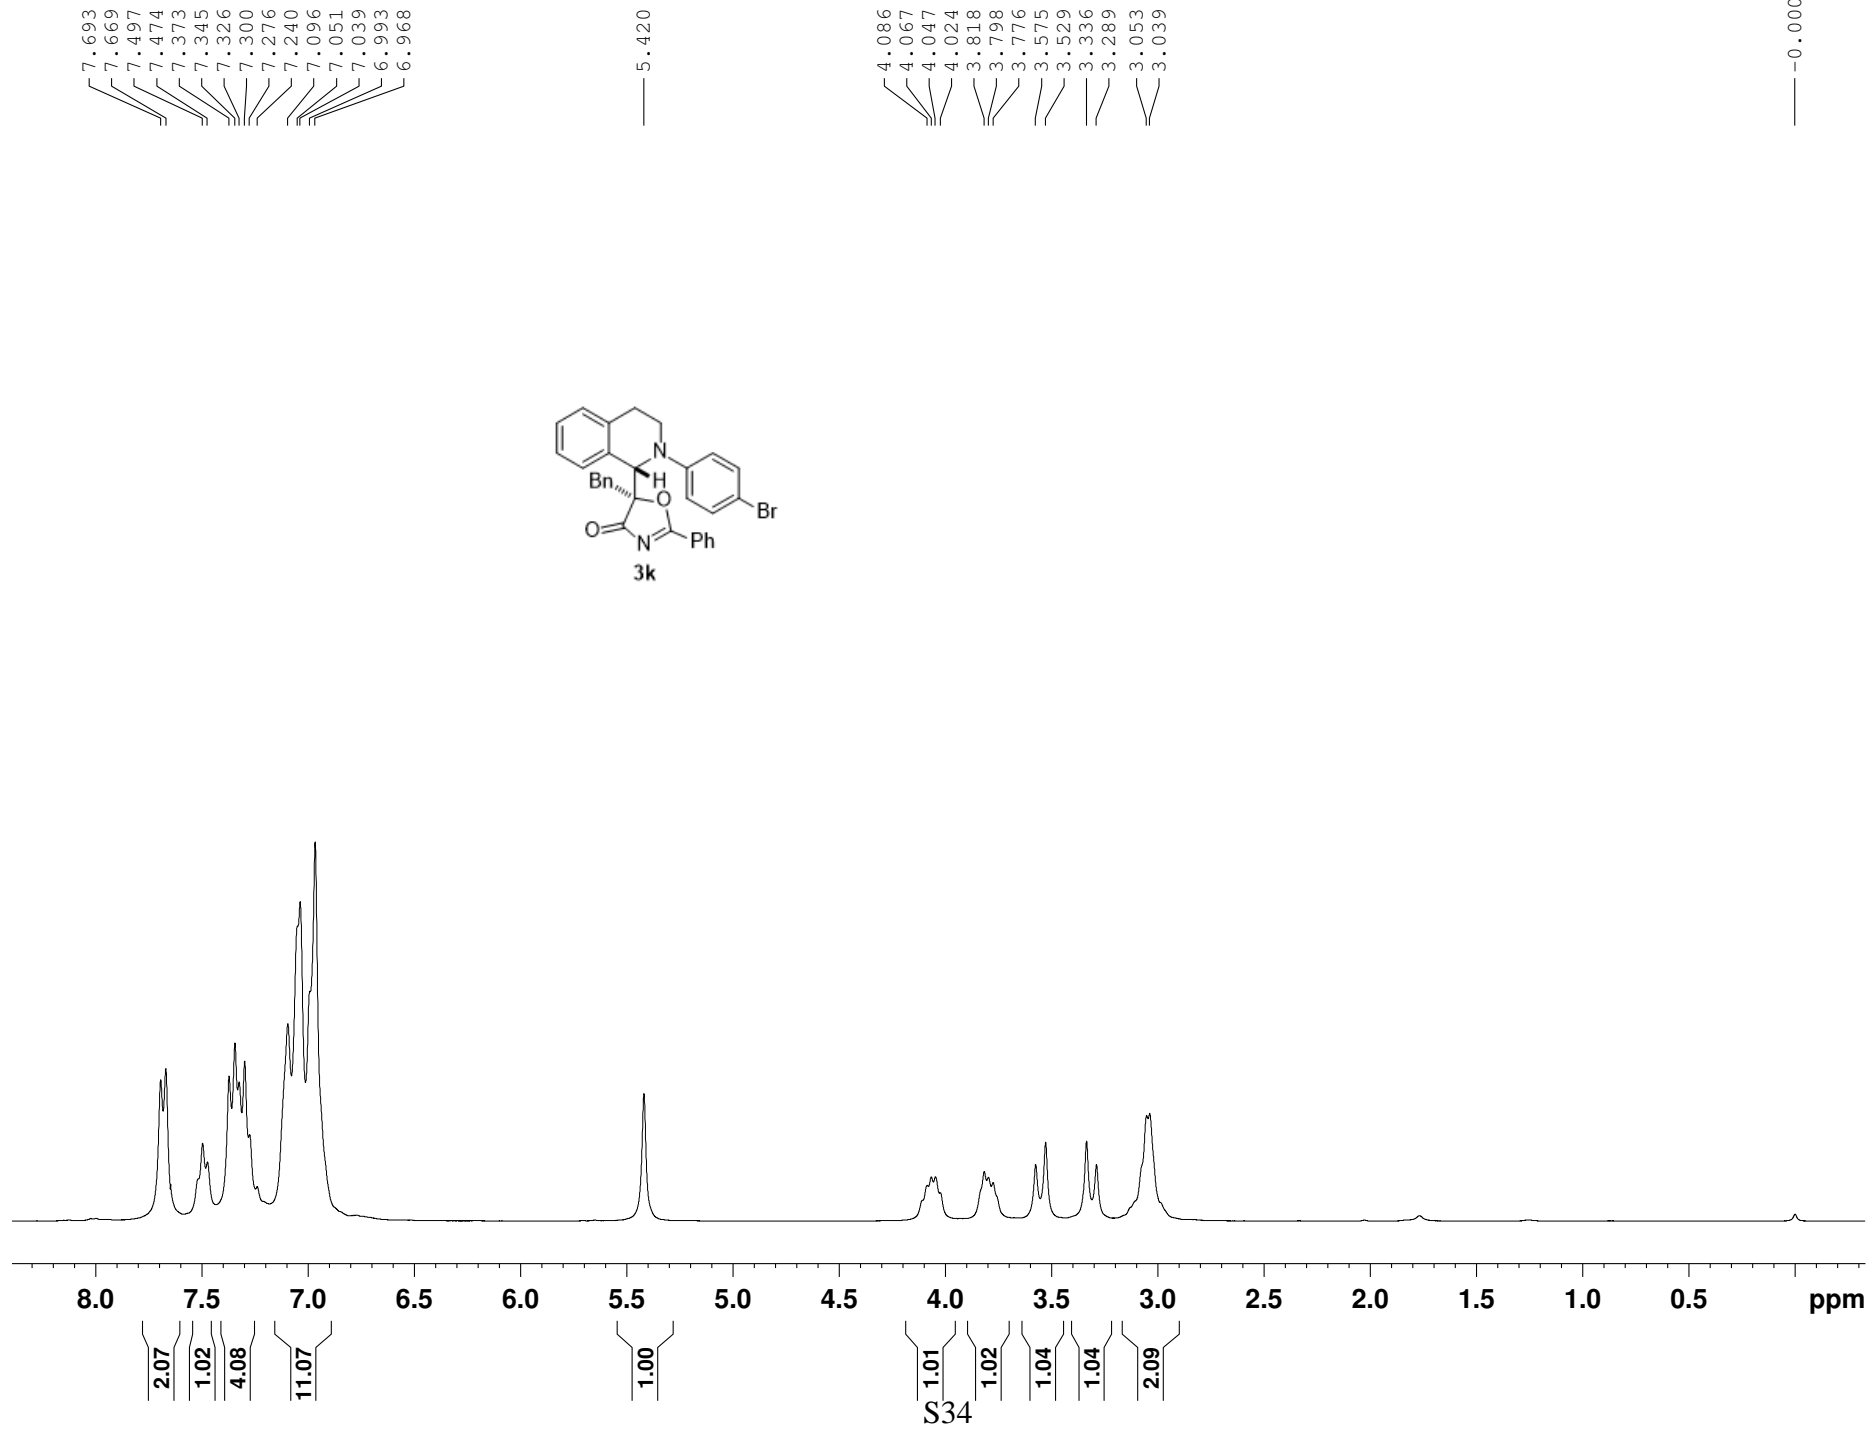

— 193.17

— 185.42

148.33  
135.25  
134.77  
132.89  
132.09  
130.84  
129.91  
129.21  
128.55  
128.21  
128.12  
127.85  
127.18  
126.94  
126.12  
124.87  
116.24  
110.58

— 95.11

77.43  
77.00  
76.58

— 63.22

— 43.16  
— 39.73

— 26.02

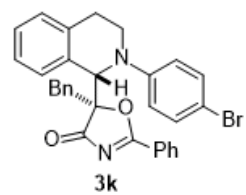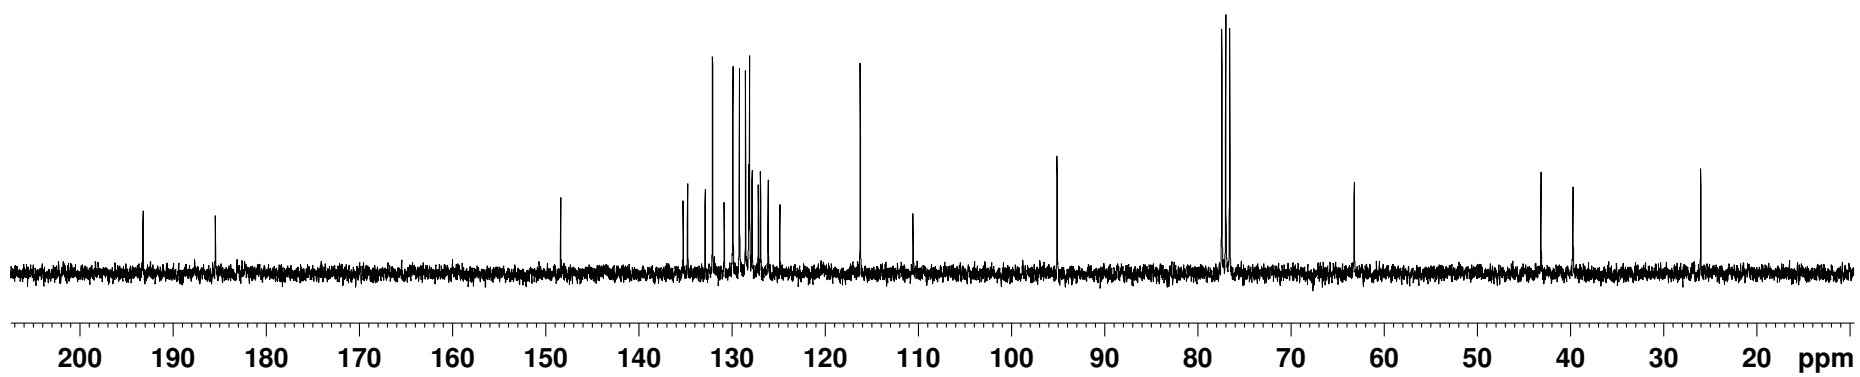

7.703  
7.685  
7.513  
7.315  
7.252  
7.110  
7.058  
7.002  
6.971

5.319

4.102  
3.819  
3.675  
3.628  
3.337  
3.290  
3.019  
2.958

-0.000

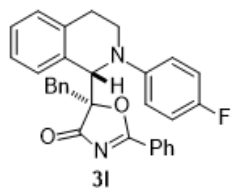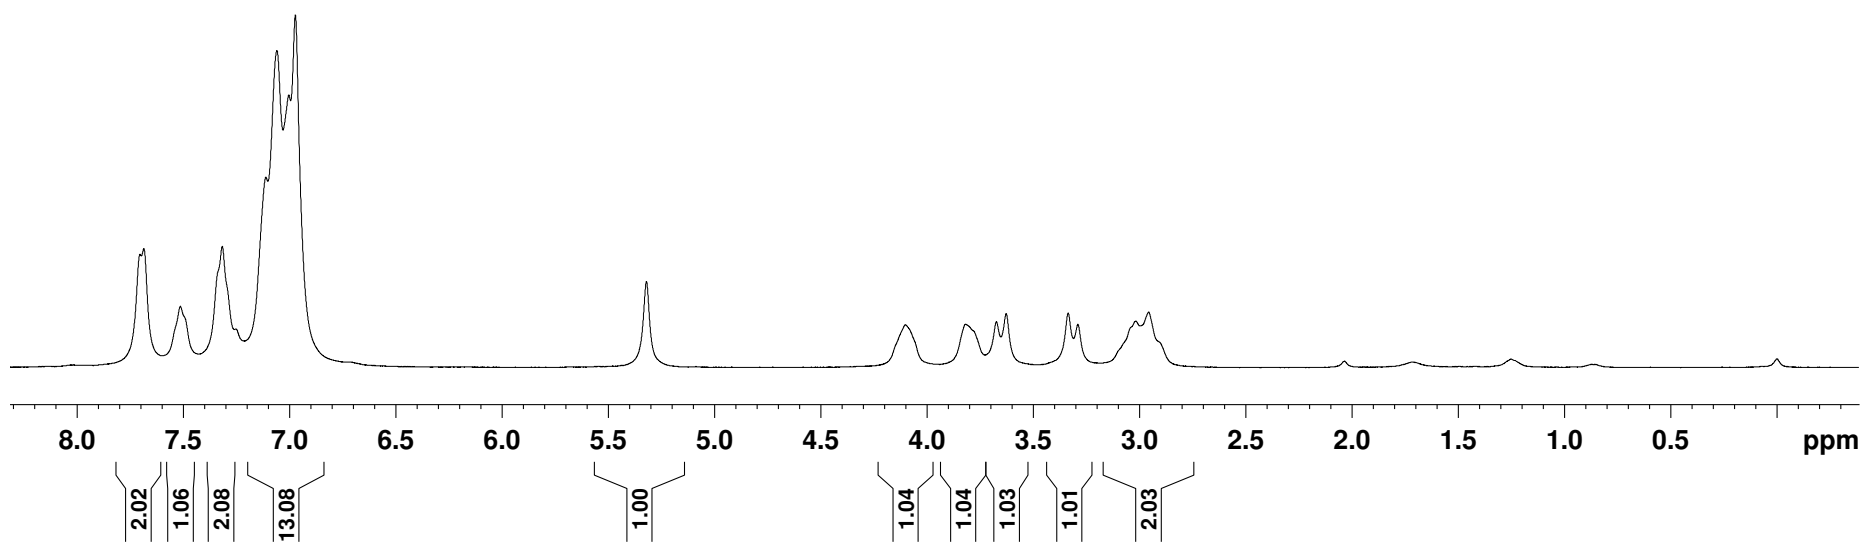

S36

— 193.32

— 185.46

146.10  
135.41  
134.72  
133.16  
130.98  
129.98  
129.26  
128.57  
128.36  
128.14  
127.74  
127.16  
127.06  
126.13  
125.04  
117.09  
116.99  
115.94  
115.65

— 95.49

77.42  
77.00  
76.57

— 63.74

— 44.08

— 39.84

— 25.61

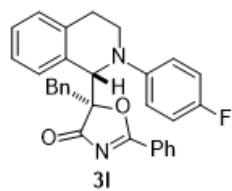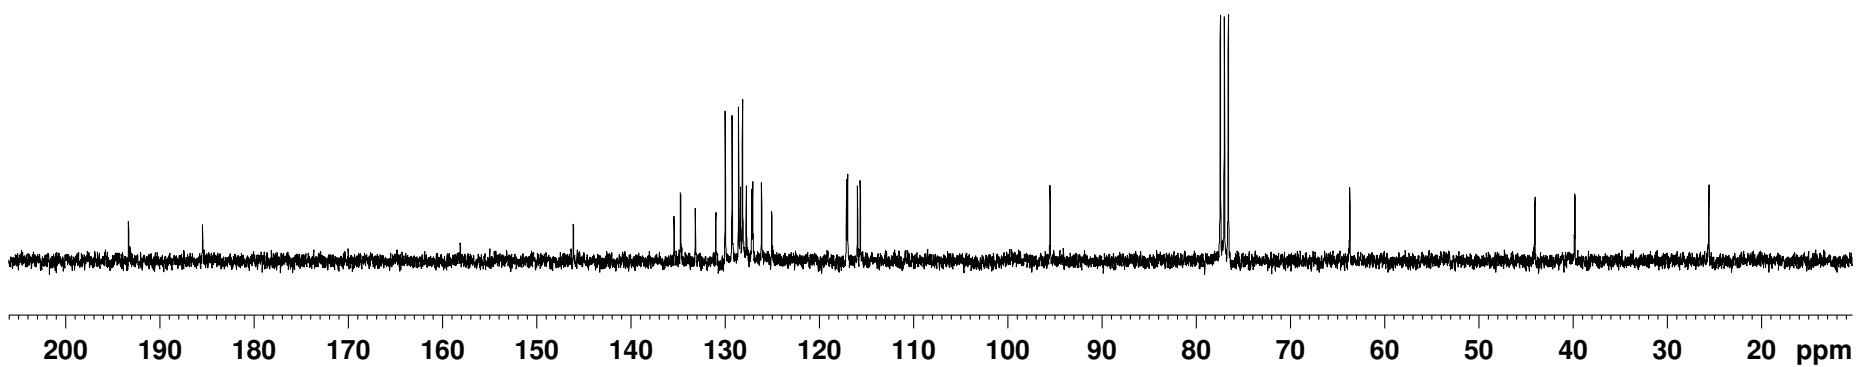

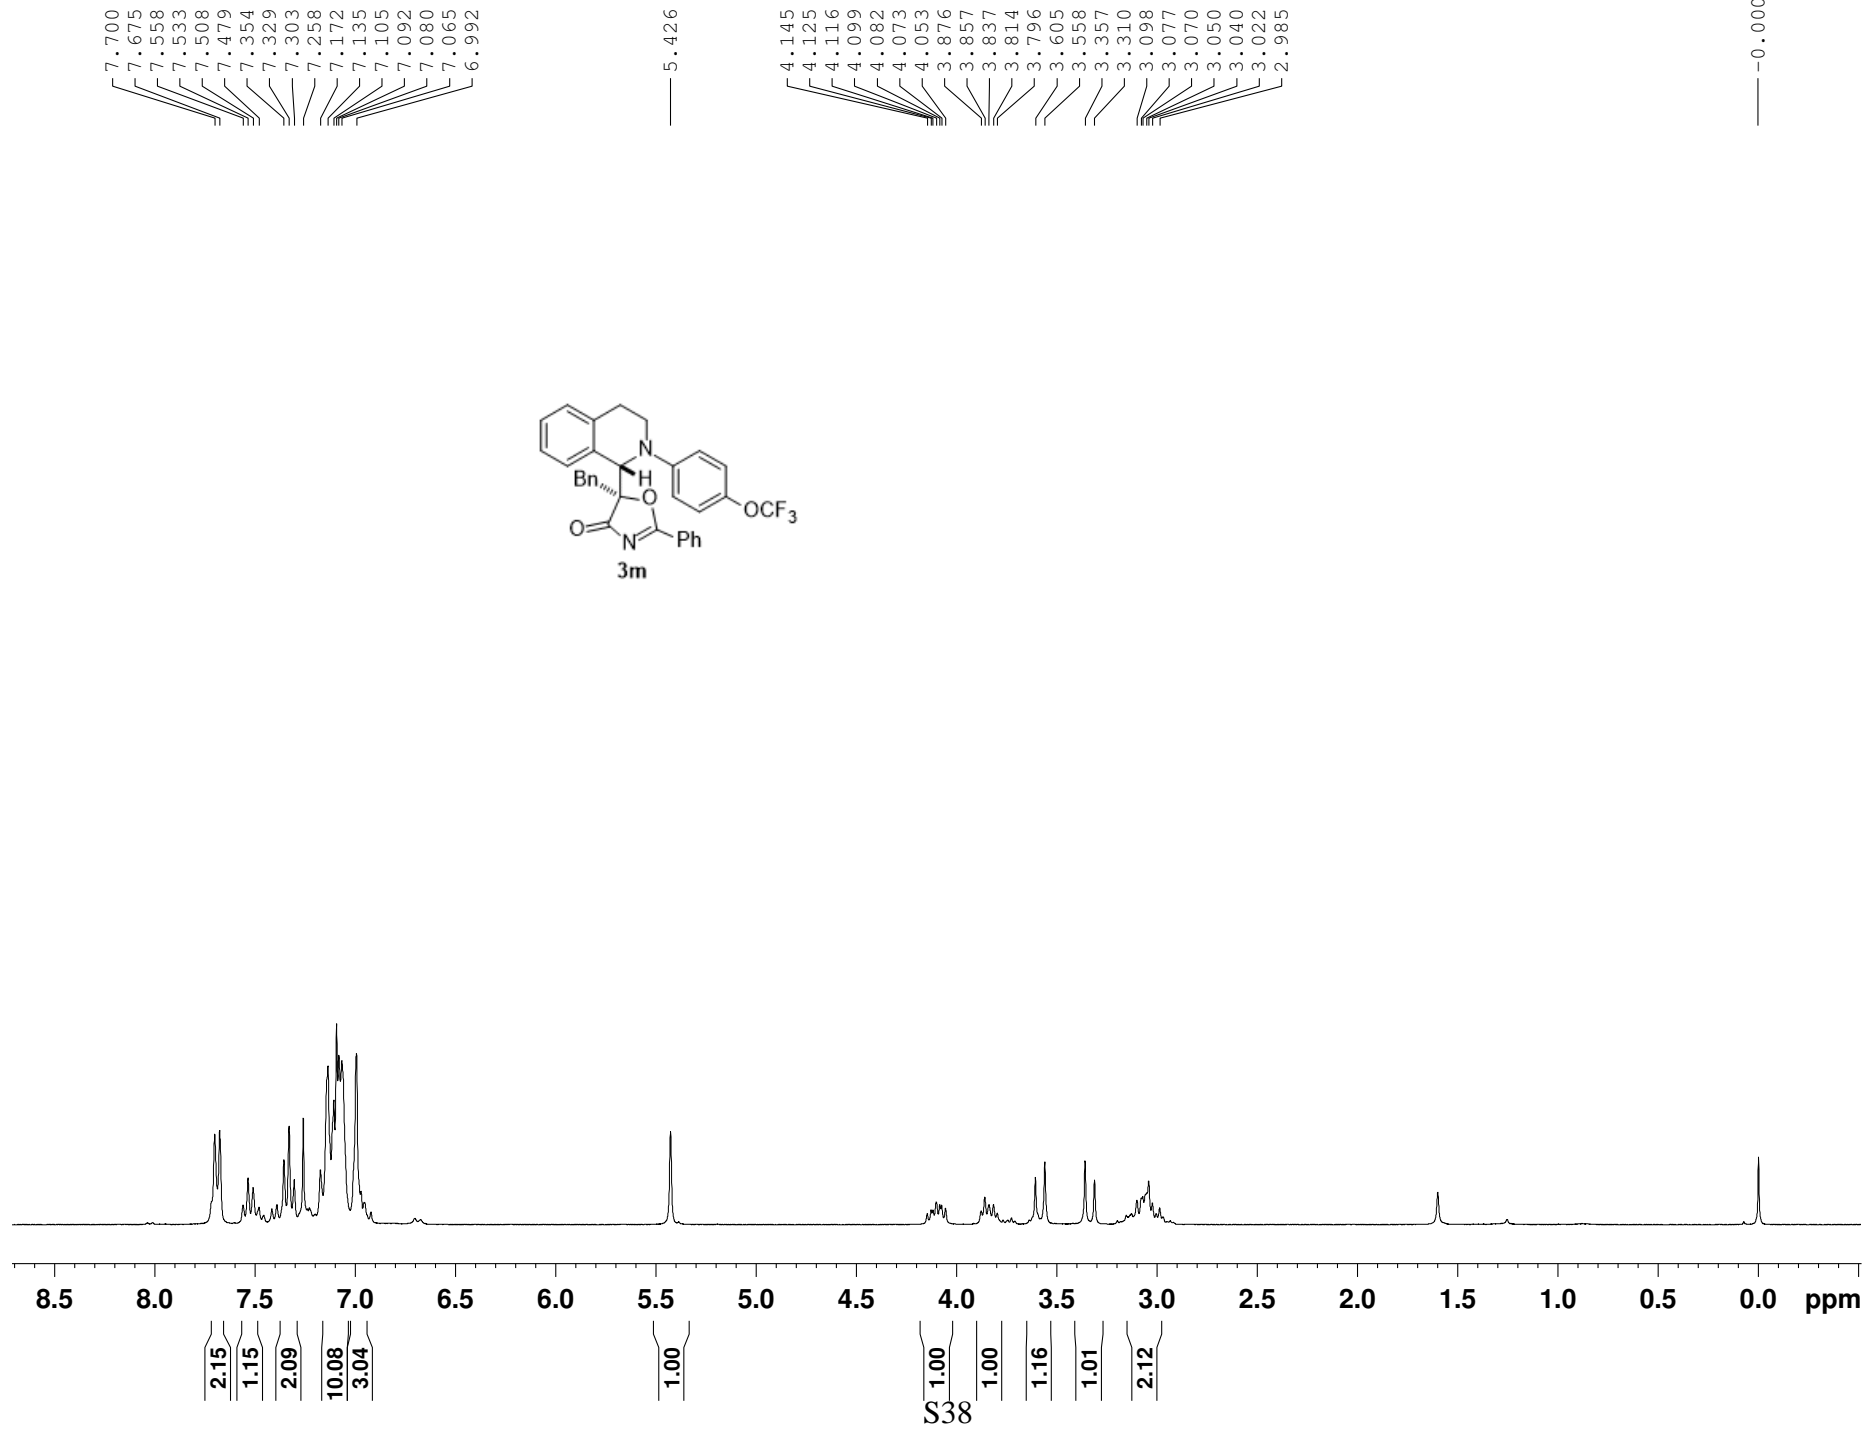

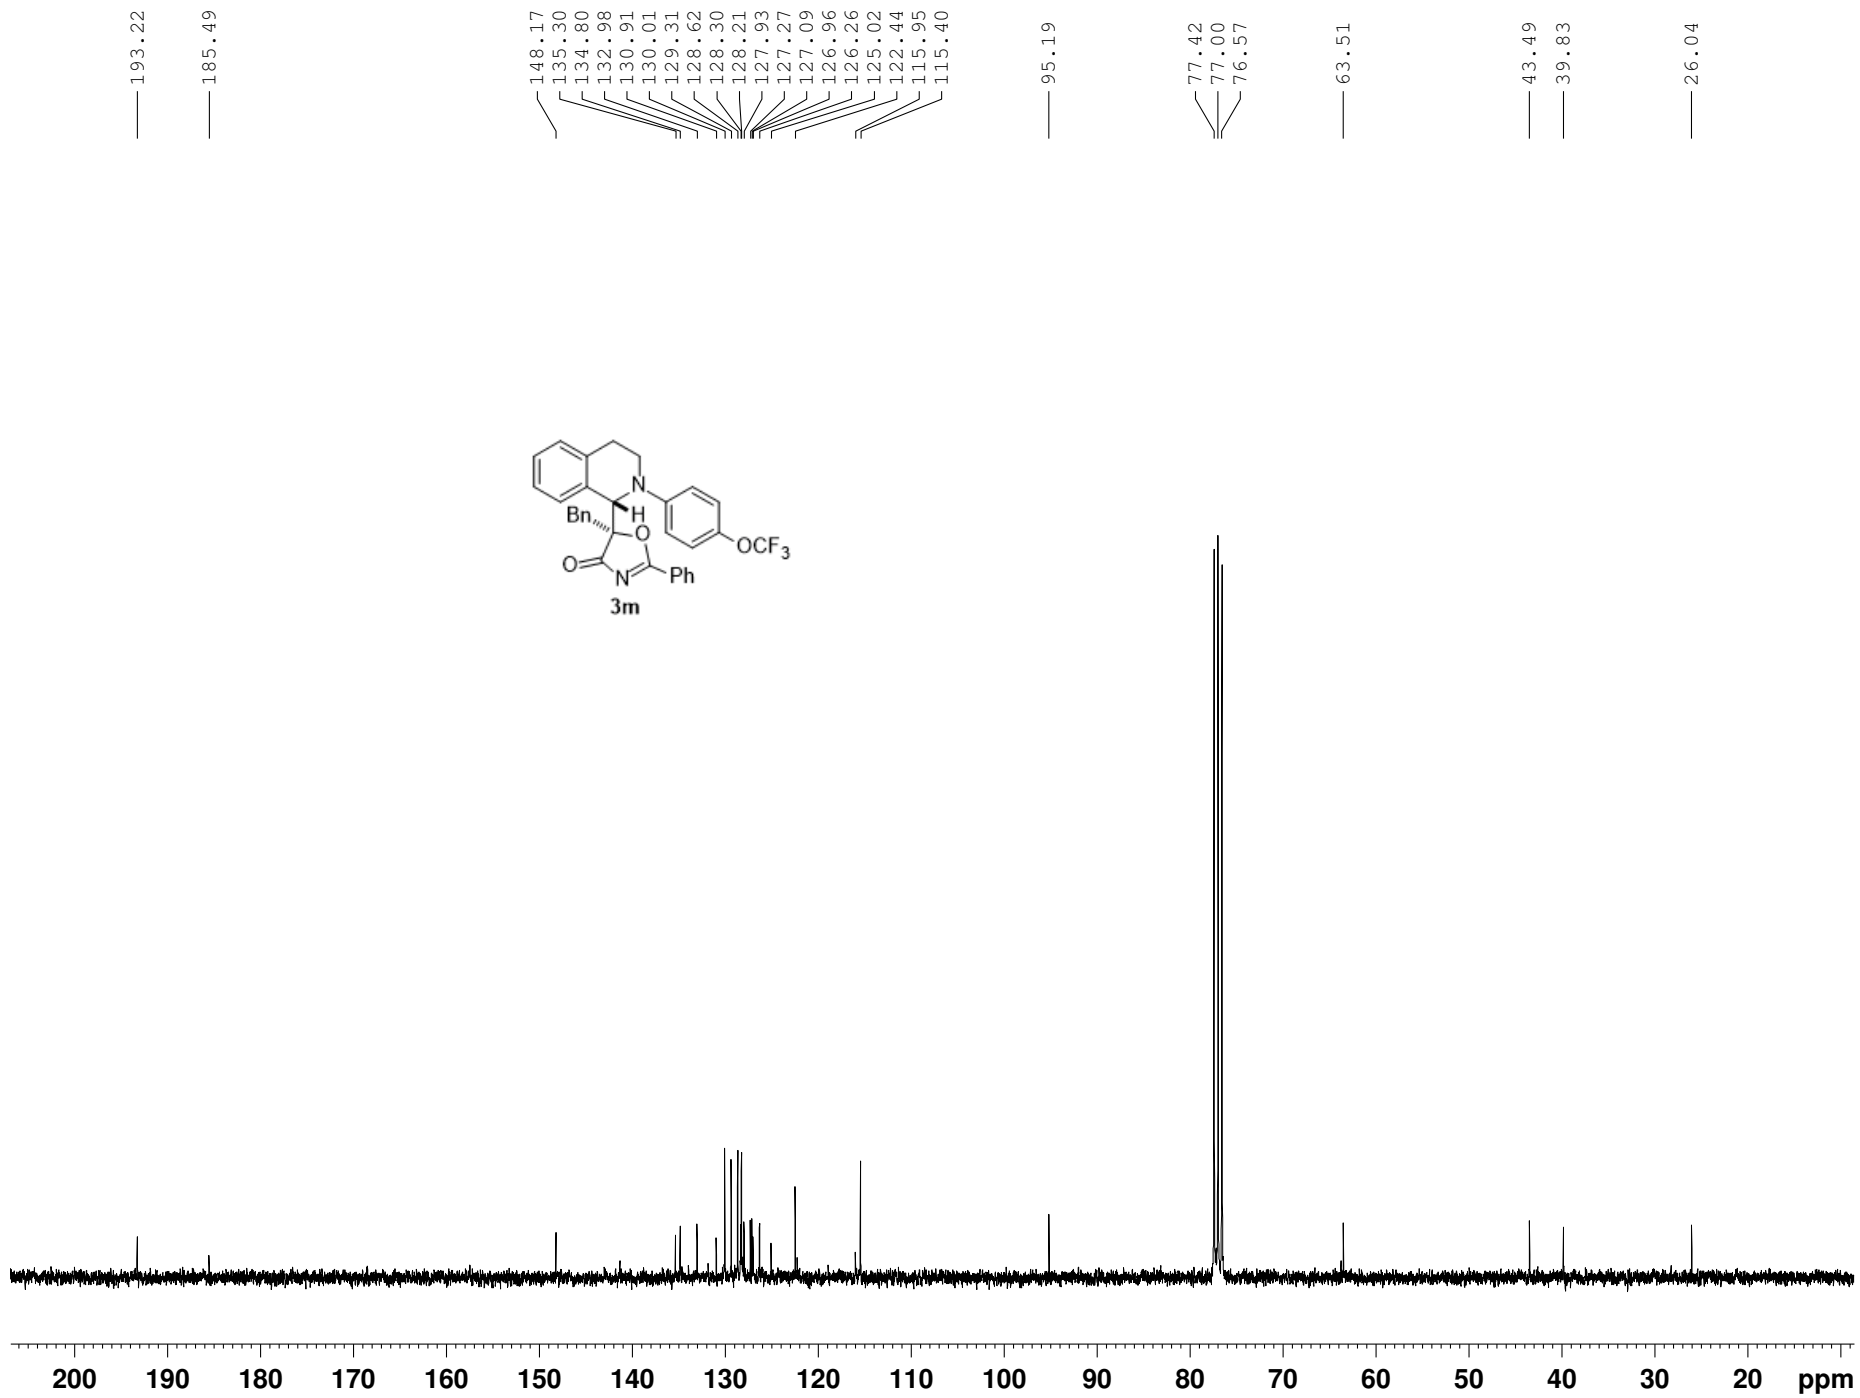



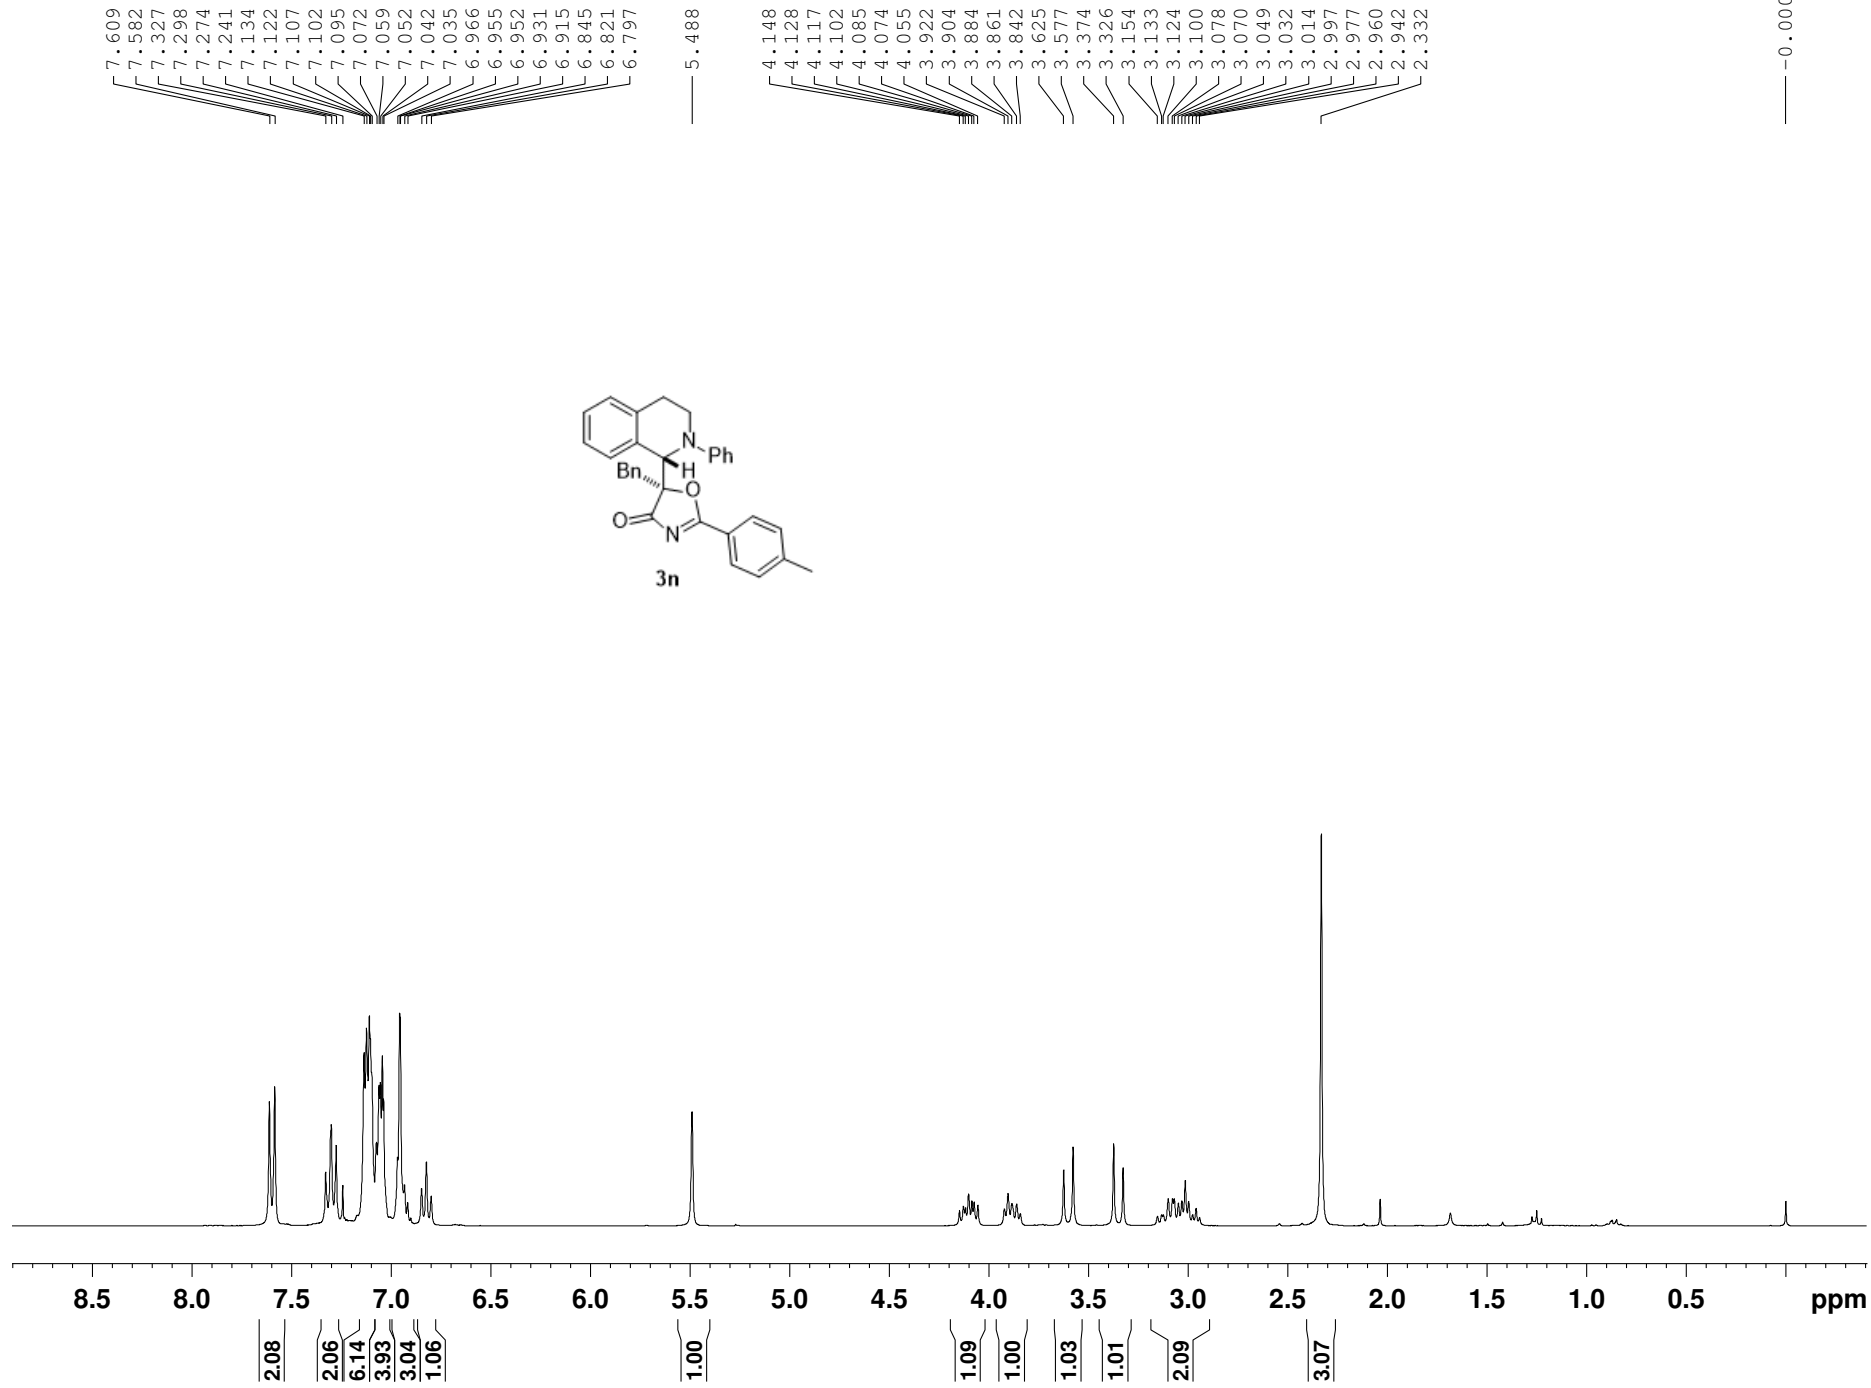

S40

— 193.40

— 185.38

— 149.39

— 146.01

— 135.50

— 133.29

— 131.34

— 129.99

— 129.45

— 129.35

— 128.20

— 128.09

— 127.63

— 127.07

— 126.00

— 122.27

— 118.63

— 114.69

— 95.31

— 77.42

— 77.00

— 76.58

— 63.26

— 42.98

— 39.82

— 26.09

— 21.87

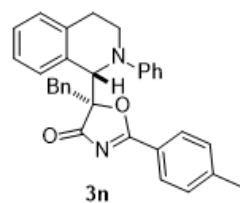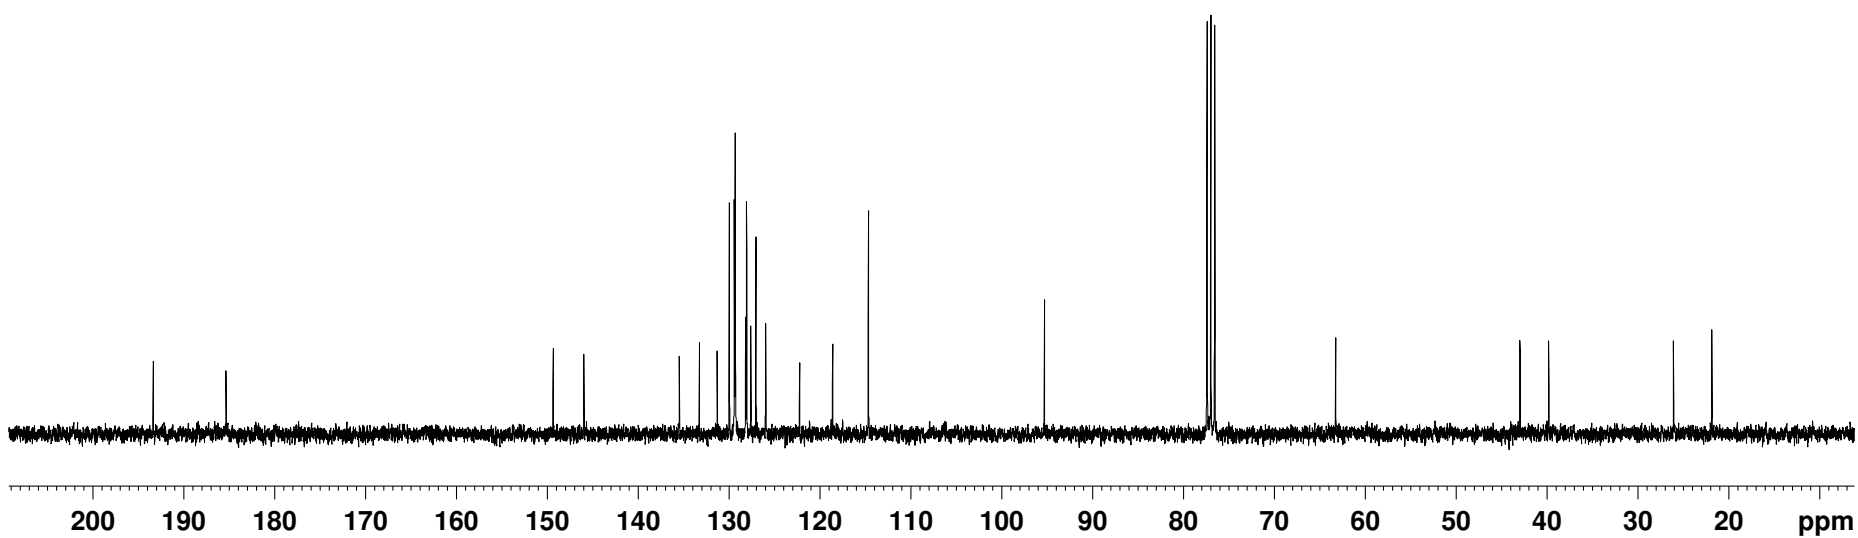

S41

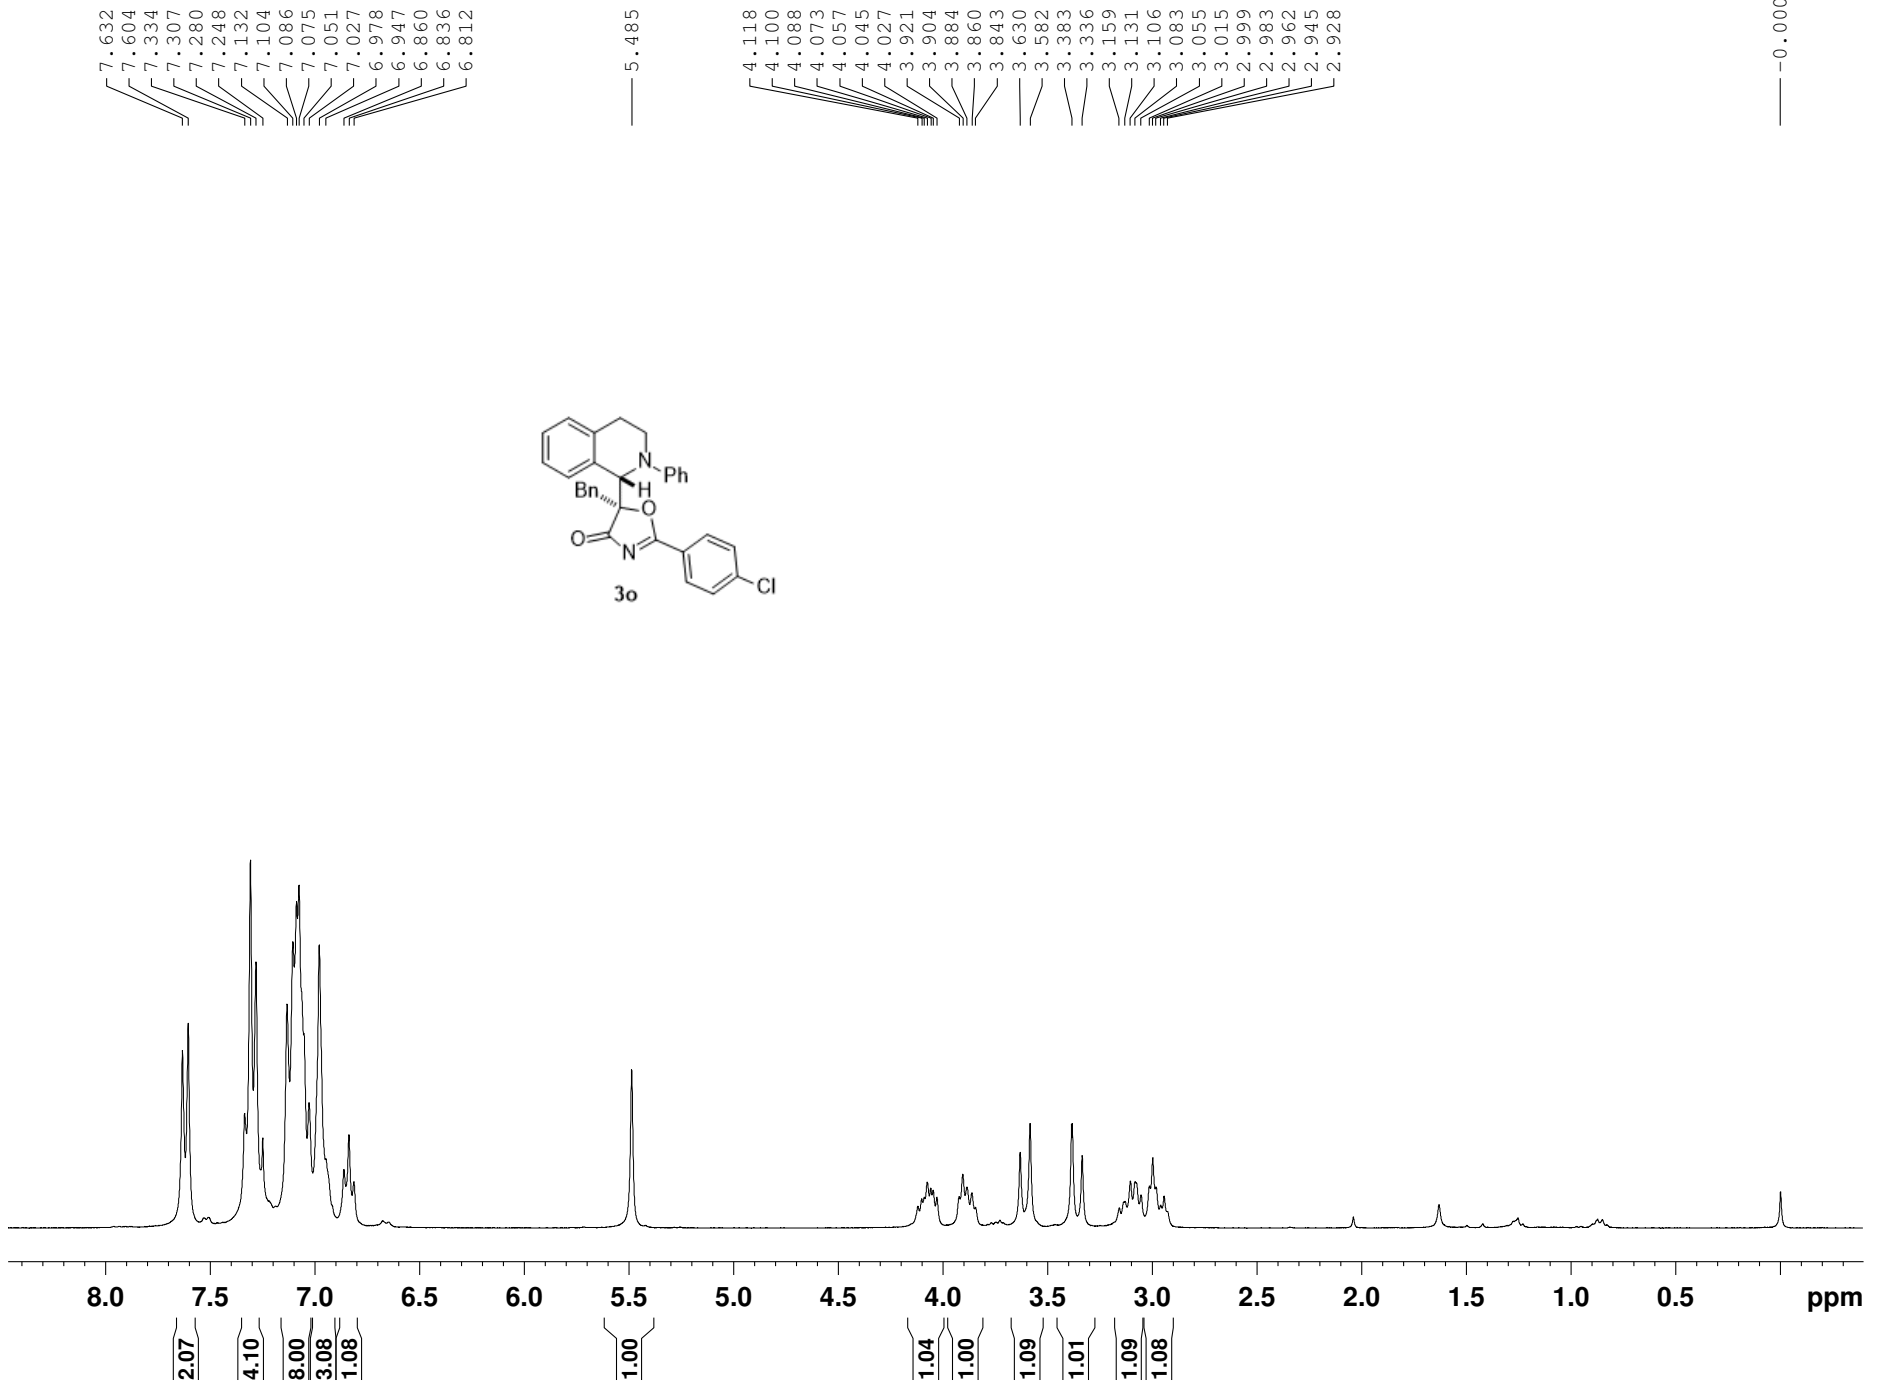

— 193.15

— 184.37

— 149.33  
— 141.35  
— 135.50  
— 133.11  
— 131.20  
— 130.47  
— 129.96  
— 129.11  
— 128.27  
— 128.18  
— 127.78  
— 127.22  
— 127.00  
— 126.09  
— 123.50  
— 118.82  
— 114.78

— 95.84

— 77.42  
— 77.00  
— 76.58

— 63.34

— 43.08  
— 39.83

— 26.13

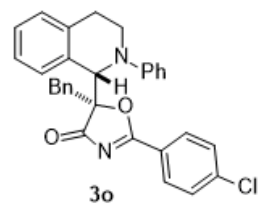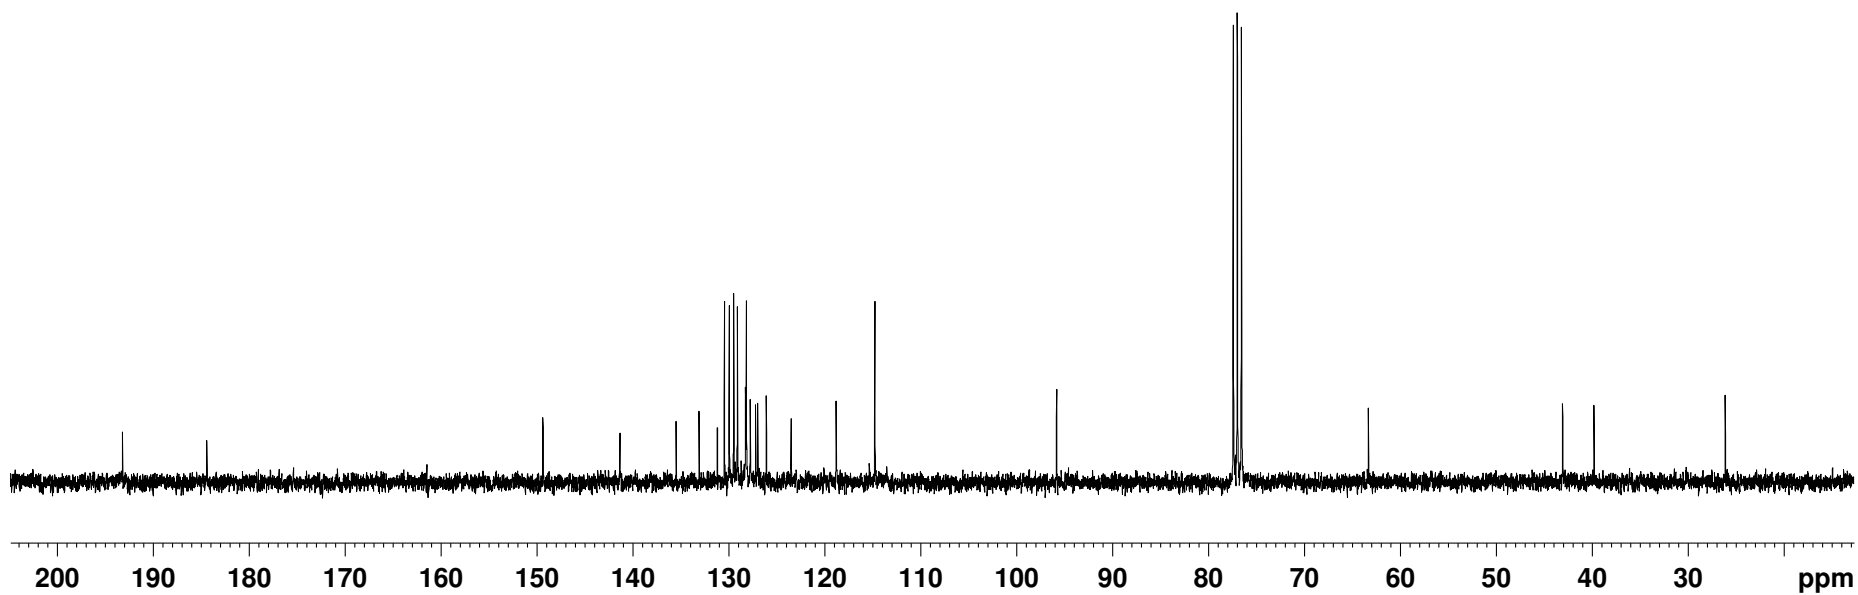

Supplement: c4cc04508d1.pdf [file c4cc04508d1.pdf]
